# Supplementary material for: Angle distortion model for predicting enediyne activation towards Bergman cyclization: an alternate to the distance theory
Source: Royal Society of Chemistry journal article supplement (doi:10.1039/d2ra03193k), 2022-01-01
Supplement: d2ra03193k1.pdf [file d2ra03193k1.pdf]

## ANGLE DISTORTION MODEL FOR PREDICTING ENEDIYNE ACTIVATION TOWARDS BERGMAN CYCLIZATION: AN ALTERNATE TO THE DISTANCE THEORY

Prabuddha Bhattacharya<sup>\*a</sup>, Soham Chakraborty<sup>b</sup>, Ashwin Balaji<sup>c</sup> and Amit Basak<sup>\*d</sup>

<sup>a</sup> Department of Chemistry, Mrinalini Datta Mahavidyapith, Kolkata 700 051, India

<sup>b</sup> Department of Chemistry, Indian Institute of Technology (Indian School of Mines) Dhanbad 826 004, India

<sup>c</sup> Department of Chemistry, Indian Institute of Technology Kharagpur 721 302, India

<sup>d</sup> Division of Chemical Science, Indian Institute of Science Education and Research Kolkata 741 246, India

### Table of Contents

| SERIAL NUMBER | CONTENT                                                                                                                                                                                                                                  | PAGE NUMBERS |
|---------------|------------------------------------------------------------------------------------------------------------------------------------------------------------------------------------------------------------------------------------------|--------------|
| 1.            | Distance between alkyne carbon atoms a-b and c-d; angles P <sub>a</sub> , P <sub>b</sub> , D <sub>c</sub> and D <sub>d</sub> for the studied enediynes.                                                                                  | S2-S4        |
| 2.            | Optimized geometries (ball and stick model), cartesian coordinates of the optimized structures and energy values.                                                                                                                        | S5-S59       |
| 3.            | Comparative table on the important structural parameters of the theoretical models with the available crystal data for compound <b>17</b> and <b>29</b> .                                                                                | S60          |
| 4.            | Comparative table on the important structural parameters and energy values for some of the borderline compounds (with respect to the average interior angle value) using B3LYP/6-311G(d,p) along with the previously used theory levels. | S61          |

**1. Distance between alkyne carbon atoms a-b and c-d; angles  $P_a$ ,  $P_b$ ,  $D_c$  and  $D_d$  for the studied enediynes**

| Entry | Enediyne Molecule<br>(Along with their reactivities) | DFT Theory Level    | a-b (distance in Å) | c-d (distance in Å) | Bond angle (in degrees) |        |        |        |
|-------|------------------------------------------------------|---------------------|---------------------|---------------------|-------------------------|--------|--------|--------|
|       |                                                      |                     |                     |                     | $P_a$                   | $P_b$  | $D_c$  | $D_d$  |
| A     | 10                                                   | B3LYP/6-31G+(d,p)   | 3.002               | 4.488               | 182.26                  | 182.27 | 178.80 | 178.74 |
|       |                                                      | B3LYP/6-311G++(d,p) | 2.994               | 4.463               | 182.06                  | 182.04 | 179.17 | 179.18 |
| B     | 11                                                   | B3LYP/6-31G+(d,p)   | 2.813               | 4.171               | 183.62                  | 183.62 | 178.13 | 178.13 |
|       |                                                      | B3LYP/6-311G++(d,p) | 2.809               | 4.152               | 183.39                  | 183.39 | 178.46 | 178.46 |
| C     | 12                                                   | B3LYP/6-31G+(d,p)   | 3.015               | 4.518               | 182.41                  | 182.41 | 178.90 | 178.90 |
|       |                                                      | B3LYP/6-311G++(d,p) | 3.007               | 4.490               | 182.06                  | 182.06 | 179.14 | 179.14 |
| D     | 13                                                   | B3LYP/6-31G+(d,p)   | 2.713               | 2.918               | 156.80                  | 156.51 | 169.65 | 169.89 |
|       |                                                      | B3LYP/6-311G++(d,p) | 2.696               | 2.930               | 157.55                  | 157.52 | 168.80 | 168.82 |
| E     | 14                                                   | B3LYP/6-31G+(d,p)   | 2.755               | 3.376               | 165.40                  | 165.40 | 172.05 | 172.05 |
|       |                                                      | B3LYP/6-311G++(d,p) | 2.746               | 3.383               | 165.89                  | 165.89 | 171.43 | 171.43 |
| F     | 15                                                   | B3LYP/6-31G+(d,p)   | 2.748               | 3.353               | 166.90                  | 166.90 | 172.81 | 172.81 |
|       |                                                      | B3LYP/6-311G++(d,p) | 2.739               | 3.357               | 167.34                  | 167.34 | 172.29 | 172.29 |
| G     | 16                                                   | B3LYP/6-31G+(d,p)   | 2.753               | 3.350               | 167.10                  | 167.11 | 172.96 | 172.95 |
|       |                                                      | B3LYP/6-311G++(d,p) | 2.744               | 3.352               | 167.53                  | 167.54 | 172.53 | 172.53 |
| H     | 17                                                   | B3LYP/6-31G+(d,p)   | 2.834               | 3.763               | 171.88                  | 170.56 | 172.24 | 169.24 |

|          |           |                     |       |       |        |        |        |        |
|----------|-----------|---------------------|-------|-------|--------|--------|--------|--------|
|          |           | B3LYP/6-311G++(d,p) | 2.829 | 3.748 | 171.76 | 170.29 | 172.47 | 169.56 |
| <b>I</b> | <b>18</b> | B3LYP/6-31G+(d,p)   | 2.916 | 4.168 | 177.45 | 177.87 | 174.46 | 174.74 |
|          |           | B3LYP/6-311G++(d,p) | 2.912 | 4.149 | 177.07 | 177.62 | 174.73 | 175.26 |
| <b>J</b> | <b>19</b> | B3LYP/6-31G+(d,p)   | 2.738 | 3.339 | 164.24 | 166.38 | 171.71 | 172.18 |
|          |           | B3LYP/6-311G++(d,p) | 2.729 | 3.338 | 164.72 | 166.53 | 171.30 | 172.02 |
| <b>K</b> | <b>20</b> | B3LYP/6-31G+(d,p)   | 2.740 | 3.348 | 166.64 | 167.68 | 171.74 | 171.10 |
|          |           | B3LYP/6-311G++(d,p) | 2.732 | 3.345 | 167.02 | 167.77 | 171.53 | 171.00 |
| <b>L</b> | <b>21</b> | B3LYP/6-31G+(d,p)   | 2.746 | 3.298 | 163.81 | 164.23 | 175.00 | 174.88 |
|          |           | B3LYP/6-311G++(d,p) | 2.734 | 3.310 | 164.54 | 164.97 | 174.08 | 174.12 |
| <b>M</b> | <b>22</b> | B3LYP/6-31G+(d,p)   | 2.770 | 3.441 | 166.33 | 166.25 | 171.00 | 169.84 |
|          |           | B3LYP/6-311G++(d,p) | 2.760 | 3.436 | 166.60 | 166.43 | 170.80 | 169.74 |
| <b>N</b> | <b>23</b> | B3LYP/6-31G+(d,p)   | 2.773 | 3.482 | 167.01 | 167.01 | 168.31 | 168.66 |
|          |           | B3LYP/6-311G++(d,p) | 2.764 | 3.470 | 167.10 | 167.05 | 168.39 | 168.81 |
| <b>O</b> | <b>24</b> | B3LYP/6-31G+(d,p)   | 2.763 | 3.504 | 168.15 | 168.11 | 168.73 | 166.52 |
|          |           | B3LYP/6-311G++(d,p) | 2.758 | 3.490 | 168.14 | 167.83 | 168.93 | 166.78 |
| <b>P</b> | <b>25</b> | B3LYP/6-31G+(d,p)   | 2.715 | 3.171 | 161.92 | 162.59 | 172.92 | 175.43 |
|          |           | B3LYP/6-311G++(d,p) | 2.702 | 3.182 | 162.68 | 163.41 | 172.83 | 174.97 |
| <b>Q</b> | <b>26</b> | B3LYP/6-31G+(d,p)   | 2.812 | 3.654 | 170.17 | 168.98 | 161.45 | 163.00 |
|          |           | B3LYP/6-311G++(d,p) | 2.807 | 3.628 | 169.46 | 168.69 | 162.46 | 163.58 |

|          |           |                     |       |       |        |        |        |        |
|----------|-----------|---------------------|-------|-------|--------|--------|--------|--------|
| <b>R</b> | <b>27</b> | B3LYP/6-31G+(d,p)   | 2.746 | 3.300 | 163.21 | 164.90 | 172.73 | 173.54 |
|          |           | B3LYP/6-311G++(d,p) | 2.733 | 3.309 | 163.87 | 165.60 | 172.38 | 172.75 |
| <b>S</b> | <b>28</b> | B3LYP/6-31G+(d,p)   | 2.740 | 3.252 | 163.36 | 162.98 | 175.37 | 173.80 |
|          |           | B3LYP/6-311G++(d,p) | 2.727 | 3.260 | 164.23 | 163.47 | 174.88 | 173.19 |
| <b>T</b> | <b>29</b> | B3LYP/6-31G+(d,p)   | 2.748 | 3.418 | 168.62 | 164.93 | 172.52 | 170.90 |
|          |           | B3LYP/6-311G++(d,p) | 2.740 | 3.414 | 168.71 | 165.29 | 172.39 | 170.59 |
| <b>U</b> | <b>30</b> | B3LYP/6-31G+(d,p)   | 2.751 | 3.468 | 168.99 | 166.68 | 165.85 | 170.55 |
|          |           | B3LYP/6-311G++(d,p) | 2.745 | 3.456 | 168.73 | 166.87 | 166.27 | 170.47 |
| <b>V</b> | <b>31</b> | B3LYP/6-31G+(d,p)   | 2.750 | 3.434 | 167.53 | 166.67 | 168.52 | 170.78 |
|          |           | B3LYP/6-311G++(d,p) | 2.742 | 3.429 | 167.58 | 166.93 | 168.56 | 170.50 |
| <b>W</b> | <b>32</b> | B3LYP/6-31G+(d,p)   | 2.748 | 3.420 | 167.17 | 166.49 | 169.36 | 171.28 |
|          |           | B3LYP/6-311G++(d,p) | 2.741 | 3.416 | 167.22 | 166.73 | 169.29 | 171.08 |
| <b>X</b> | <b>33</b> | B3LYP/6-31G+(d,p)   | 2.733 | 3.315 | 165.33 | 164.73 | 172.93 | 173.86 |
|          |           | B3LYP/6-311G++(d,p) | 2.722 | 3.317 | 165.62 | 165.29 | 172.66 | 173.28 |

## 2. Optimized geometries, cartesian coordinates of the optimized structures and energy values (in atomic units)

**ENTRY: A**

**MOLECULE: 10**

|                         |                   |
|-------------------------|-------------------|
| <b>DFT Theory Level</b> | B3LYP/6-31G+(d,p) |
| <b>Energy (Hartree)</b> | -230.901361       |



Cartesian coordinates of optimized enediyne **10** at B3LYP/6-31G+(d,p) level of theory, in gas phase.

|   |             |             |            |
|---|-------------|-------------|------------|
| C | -1.14885800 | 0.55569700  | 0.00000000 |
| C | 0.00000000  | 1.27617700  | 0.00000000 |
| C | 1.31051500  | 0.73524900  | 0.00000000 |
| C | -1.23260200 | -0.85961300 | 0.00000000 |
| C | -1.35198900 | -2.06743600 | 0.00000000 |
| C | 2.44990900  | 0.31706200  | 0.00000000 |
| H | -1.43456200 | -3.13035900 | 0.00000000 |
| H | 3.44243100  | -0.07219300 | 0.00000000 |
| H | -2.09181200 | 1.09838100  | 0.00000000 |
| H | -0.07790500 | 2.36135300  | 0.00000000 |

|                         |                     |
|-------------------------|---------------------|
| <b>DFT Theory Level</b> | B3LYP/6-311G++(d,p) |
| <b>Energy (Hartree)</b> | -230.951199         |



Cartesian coordinates of optimized enediyne **10** at B3LYP/6-311G++(d,p) level of theory, in gas phase.

|   |             |             |            |
|---|-------------|-------------|------------|
| C | 0.00000000  | 1.27253200  | 0.00000000 |
| C | -1.14526200 | 0.55486100  | 0.00000000 |
| C | -1.22920200 | -0.85732900 | 0.00000000 |
| C | 1.30743900  | 0.73225700  | 0.00000000 |
| C | 2.43786400  | 0.31209800  | 0.00000000 |
| C | -1.34365800 | -2.05785300 | 0.00000000 |
| H | 3.42840900  | -0.07256400 | 0.00000000 |
| H | -1.42933700 | -3.11700800 | 0.00000000 |
| H | -0.07436500 | 2.35593400  | 0.00000000 |
| H | -2.08778300 | 1.09424100  | 0.00000000 |

**ENTRY: B**  
**MOLECULE: 11**

|                         |                   |
|-------------------------|-------------------|
| <b>DFT Theory Level</b> | B3LYP/6-31G+(d,p) |
| <b>Energy (Hartree)</b> | -466.810397       |



Cartesian coordinates of optimized enediyne **11** at B3LYP/6-31G+(d,p) level of theory, in gas phase.

```

C      -0.68406100  0.67309100  0.35788000
C      0.68428100  0.67306000  0.35783500
C      1.40679500  1.85275700  0.00225400
C     -1.40647700  1.85282700  0.00228100
C     -2.08513000  2.81784500 -0.28307400
C      2.08546900  2.81777500 -0.28305700
C      1.55361100 -0.52474800  0.69945400
C      2.19206100 -1.18877300 -0.53862800
C      3.12290200 -2.34770600 -0.16586900
C     -1.55343400 -0.52474700  0.69949000
C     -2.19208600 -1.18858500 -0.53861100
C     -3.12367800 -2.34691600 -0.16584200
H     -2.65193100  3.68362300 -0.53906100
H      2.65235500  3.68348700 -0.53908800
H      2.35460900 -0.18668100  1.36926800
H      0.97790900 -1.27276800  1.25146700
H      1.39585700 -1.54863100 -1.20255900
H      2.74911100 -0.43218300 -1.10384100
H      3.55951500 -2.80676900 -1.05922600
H      3.94789700 -2.00423100  0.46920500
H      2.58608400 -3.13133000  0.38229200
H     -0.97770300 -1.27289900  1.25133700
H     -2.35427200 -0.18664800  1.36946300
H     -2.74856400 -0.43173300 -1.10403900
H     -1.39594200 -1.54905000 -1.20227800
H     -3.56024100 -2.80602400 -1.05919900
H     -2.58748900 -3.13066500  0.38275800
H     -3.94871200 -2.00278700  0.46882700

```

|                         |                     |
|-------------------------|---------------------|
| <b>DFT Theory Level</b> | B3LYP/6-311G++(d,p) |
| <b>Energy (Hartree)</b> | -466.901875         |



Cartesian coordinates of optimized enediyne **11** at B3LYP/6-311G++(d,p) level of theory, in gas phase.

|   |             |             |             |
|---|-------------|-------------|-------------|
| C | -0.68178100 | 0.67113000  | 0.35849700  |
| C | 0.68178200  | 0.67112800  | 0.35849900  |
| C | 1.40425400  | 1.84706100  | 0.00207000  |
| C | -1.40425100 | 1.84706300  | 0.00206500  |
| C | -2.07591900 | 2.80771600  | -0.28302900 |
| C | 2.07593100  | 2.80770700  | -0.28302500 |
| C | 1.55026200  | -0.52507500 | 0.69976500  |
| C | 2.19279500  | -1.18264900 | -0.53765800 |
| C | 3.12470200  | -2.33935200 | -0.16715200 |
| C | -1.55026600 | -0.52507100 | 0.69976200  |
| C | -2.19279800 | -1.18264400 | -0.53766200 |
| C | -3.12471700 | -2.33933800 | -0.16715600 |
| H | -2.64348500 | 3.66864800  | -0.53866000 |
| H | 2.64357800  | 3.66855600  | -0.53875500 |
| H | 2.34705800  | -0.18731500 | 1.37159900  |
| H | 0.97544200  | -1.27397800 | 1.24760700  |
| H | 1.40053300  | -1.54126300 | -1.20369100 |
| H | 2.74782900  | -0.42392500 | -1.09800300 |
| H | 3.56343100  | -2.79373300 | -1.05953300 |
| H | 3.94632600  | -1.99663600 | 0.46939200  |
| H | 2.58978400  | -3.12482200 | 0.37641700  |
| H | -0.97544900 | -1.27397400 | 1.24760700  |
| H | -2.34706200 | -0.18730700 | 1.37159500  |
| H | -2.74782300 | -0.42391700 | -1.09801100 |
| H | -1.40053600 | -1.54126600 | -1.20368900 |
| H | -3.56343700 | -2.79372400 | -1.05953800 |
| H | -2.58981000 | -3.12480600 | 0.37642700  |
| H | -3.94634700 | -1.99661000 | 0.46937400  |

**ENTRY: C**  
**MOLECULE: 12**

|                         |                   |
|-------------------------|-------------------|
| <b>DFT Theory Level</b> | B3LYP/6-31G+(d,p) |
| <b>Energy (Hartree)</b> | -309.560134       |



Cartesian coordinates of optimized enediyne **12** at B3LYP/6-31G+(d,p) level of theory, in gas phase.

|   |             |             |             |
|---|-------------|-------------|-------------|
| C | -0.67905800 | 1.74879700  | -0.00011900 |
| C | 0.67906400  | 1.74881000  | 0.00011400  |
| C | 1.50772800  | 0.59819900  | 0.00023400  |
| C | -1.50768500 | 0.59817100  | -0.00019800 |
| C | -2.25920500 | -0.35781700 | -0.00027800 |
| C | 2.25923800  | -0.35779800 | 0.00033200  |
| C | -3.13885000 | -1.52207900 | 0.00018000  |
| C | 3.13880400  | -1.52212300 | -0.00021000 |
| H | -1.18455400 | 2.71277800  | -0.00025000 |
| H | 1.18453200  | 2.71280700  | 0.00009000  |
| H | -2.96486400 | -2.14681100 | -0.88365700 |
| H | -2.96669800 | -2.14470700 | 0.88585900  |
| H | -4.19303200 | -1.22366500 | -0.00126800 |
| H | 4.19300800  | -1.22377900 | -0.00088800 |
| H | 2.96626400  | -2.14580800 | 0.88465300  |
| H | 2.96512900  | -2.14577500 | -0.88486700 |

|                         |                     |
|-------------------------|---------------------|
| <b>DFT Theory Level</b> | B3LYP/6-311G++(d,p) |
| <b>Energy (Hartree)</b> | -309.622878         |



Cartesian coordinates of optimized enediyne **12** at B3LYP/6-311G++(d,p) level of theory, in gas phase.

|   |             |             |             |
|---|-------------|-------------|-------------|
| C | -0.67663500 | 1.74529300  | -0.00004700 |
| C | 0.67666400  | 1.74530400  | 0.00000300  |
| C | 1.50365200  | 0.59765500  | 0.00005100  |
| C | -1.50360400 | 0.59763000  | -0.00007400 |
| C | -2.24506300 | -0.35692000 | -0.00007800 |
| C | 2.24510900  | -0.35689700 | 0.00011200  |
| C | -3.12055700 | -1.51947100 | -0.00000800 |
| C | 3.12048300  | -1.51954000 | 0.00003000  |
| H | -1.18292100 | 2.70669100  | -0.00006600 |
| H | 1.18293600  | 2.70671000  | 0.00003100  |
| H | -2.94573800 | -2.14203500 | -0.88300300 |
| H | -2.94690100 | -2.14105400 | 0.88391000  |
| H | -4.17331100 | -1.22263500 | -0.00085800 |
| H | 4.17326700  | -1.22281100 | -0.00111800 |
| H | 2.94699900  | -2.14104100 | 0.88404000  |
| H | 2.94536700  | -2.14215000 | -0.88287400 |

**ENTRY: D**  
**MOLECULE: 13**

|                         |                   |
|-------------------------|-------------------|
| <b>DFT Theory Level</b> | B3LYP/6-31G+(d,p) |
| <b>Energy (Hartree)</b> | -347.643796       |



Cartesian coordinates of optimized enediyne **13** at B3LYP/6-31G+(d,p) level of theory, in gas phase.

|   |             |             |             |
|---|-------------|-------------|-------------|
| C | -2.31011200 | -0.68665900 | 0.06187300  |
| C | -2.31228300 | 0.68315700  | 0.06206200  |
| C | -1.05807800 | -1.35598700 | -0.01670600 |
| C | -1.06232900 | 1.35660100  | -0.01631800 |
| C | 0.15441500  | -1.45965200 | -0.09310500 |
| C | 0.15042700  | 1.45809900  | -0.09352300 |
| C | 1.60851900  | -1.32005500 | -0.19256800 |
| C | 1.60470600  | 1.32215100  | -0.19291300 |
| C | 2.12054600  | 0.00161400  | 0.44571800  |
| H | -3.24461200 | -1.23603600 | 0.11910000  |
| H | -3.24855600 | 1.22948400  | 0.11954600  |
| H | 2.11726500  | -2.16066900 | 0.29584600  |
| H | 1.90752600  | -1.35479200 | -1.25087400 |
| H | 1.90421700  | 1.35746700  | -1.25099700 |
| H | 2.11116700  | 2.16392900  | 0.29593400  |
| H | 1.86271500  | 0.00156900  | 1.51021800  |
| H | 3.21542400  | 0.00342500  | 0.37410900  |

|                         |                     |
|-------------------------|---------------------|
| <b>DFT Theory Level</b> | B3LYP/6-311G++(d,p) |
| <b>Energy (Hartree)</b> | -347.712884         |



Cartesian coordinates of optimized enediyne **13** at B3LYP/6-311G++(d,p) level of theory, in gas phase.

|   |             |             |             |
|---|-------------|-------------|-------------|
| C | -2.30275900 | -0.68259000 | 0.06163100  |
| C | -2.30291100 | 0.68237900  | 0.06173400  |
| C | -1.05284400 | -1.34820600 | -0.01618000 |
| C | -1.05311400 | 1.34827700  | -0.01599600 |
| C | 0.15043000  | -1.46516100 | -0.09257500 |
| C | 0.15016100  | 1.46497400  | -0.09285600 |
| C | 1.60036700  | -1.32121700 | -0.19283700 |
| C | 1.60014900  | 1.32133800  | -0.19284900 |
| C | 2.11071000  | 0.00013700  | 0.44486800  |
| H | -3.23562700 | -1.23118100 | 0.11773000  |
| H | -3.23590100 | 1.23074700  | 0.11793800  |

|   |            |             |             |
|---|------------|-------------|-------------|
| H | 2.11038500 | -2.15911900 | 0.29471500  |
| H | 1.89759500 | -1.35648400 | -1.24962000 |
| H | 1.89757300 | 1.35675700  | -1.24957600 |
| H | 2.10980400 | 2.15940200  | 0.29481200  |
| H | 1.85112200 | 0.00008600  | 1.50693800  |
| H | 3.20391700 | 0.00020300  | 0.37742700  |

**ENTRY: E**  
**MOLECULE: 14**

|                         |                   |
|-------------------------|-------------------|
| <b>DFT Theory Level</b> | B3LYP/6-31G+(d,p) |
| <b>Energy (Hartree)</b> | -386.969326       |



Cartesian coordinates of optimized enediyne **14** at B3LYP/6-31G+(d,p) level of theory, in gas phase.

|   |             |             |             |
|---|-------------|-------------|-------------|
| C | 0.01455200  | 0.68206800  | 2.56791300  |
| C | -0.01455200 | -0.68206800 | 2.56791300  |
| C | 0.01467300  | 1.37758600  | 1.32946500  |
| C | -0.01467300 | -1.37758600 | 1.32946500  |
| C | -0.01455200 | 1.68815700  | 0.15276500  |
| C | 0.01455200  | -1.68815700 | 0.15276500  |
| C | -0.11780500 | 1.87332000  | -1.29416600 |
| C | -0.52948500 | 0.56780200  | -2.02946600 |
| C | 0.11780500  | -1.87332000 | -1.29416600 |
| C | 0.52948500  | -0.56780200 | -2.02946600 |
| H | 0.02826000  | 1.22881600  | 3.50646000  |
| H | -0.02826000 | -1.22881600 | 3.50646000  |
| H | -0.85977000 | 2.65203000  | -1.51493700 |
| H | 0.83603300  | 2.24061900  | -1.69814700 |
| H | -1.46616300 | 0.20899000  | -1.58757700 |
| H | -0.76105800 | 0.84436200  | -3.06487000 |
| H | 0.85977000  | -2.65203000 | -1.51493700 |
| H | -0.83603300 | -2.24061900 | -1.69814700 |
| H | 1.46616300  | -0.20899000 | -1.58757700 |
| H | 0.76105800  | -0.84436200 | -3.06487000 |

|                         |                     |
|-------------------------|---------------------|
| <b>DFT Theory Level</b> | B3LYP/6-311G++(d,p) |
| <b>Energy (Hartree)</b> | -387.045722         |



Cartesian coordinates of optimized enediyne **14** at B3LYP/6-311G++(d,p) level of theory, in gas phase.

|   |             |             |             |
|---|-------------|-------------|-------------|
| C | 0.01525000  | 0.67956600  | 2.55553400  |
| C | -0.01525000 | -0.67956600 | 2.55553400  |
| C | 0.01525000  | 1.37305600  | 1.32004000  |
| C | -0.01525000 | -1.37305600 | 1.32004000  |
| C | -0.01409800 | 1.69150700  | 0.15336200  |
| C | 0.01409800  | -1.69150700 | 0.15336200  |
| C | -0.12263800 | 1.87334800  | -1.28970100 |
| C | -0.53189400 | 0.56457900  | -2.01722800 |
| C | 0.12263800  | -1.87334800 | -1.28970100 |
| C | 0.53189400  | -0.56457900 | -2.01722800 |
| H | 0.02943500  | 1.22609600  | 3.49206500  |
| H | -0.02943500 | -1.22609600 | 3.49206500  |
| H | -0.86745800 | 2.64717700  | -1.50851500 |
| H | 0.82657200  | 2.24311300  | -1.69707100 |
| H | -1.46164100 | 0.20371000  | -1.56776800 |
| H | -0.77167500 | 0.83252800  | -3.05074600 |
| H | 0.86745800  | -2.64717700 | -1.50851500 |
| H | -0.82657200 | -2.24311300 | -1.69707100 |
| H | 1.46164100  | -0.20371000 | -1.56776800 |
| H | 0.77167500  | -0.83252800 | -3.05074600 |

**ENTRY: F**  
**MOLECULE: 15**

|                         |                   |
|-------------------------|-------------------|
| <b>DFT Theory Level</b> | B3LYP/6-31G+(d,p) |
| <b>Energy (Hartree)</b> | -540.635643       |



Cartesian coordinates of optimized enediyne **15** at B3LYP/6-31G+(d,p) level of theory, in gas phase.

```

C      0.00547600  0.71554800  1.35808400
C     -0.00547600 -0.71554800  1.35808400
C     -0.00547600  1.37386200  0.09092100
C      0.00547600 -1.37386200  0.09092100
C     -0.04149000  1.67606800 -1.08556900
C      0.04149000 -1.67606800 -1.08556900
C     -0.13490800  1.86606800 -2.53268900
C     -0.53328900  0.56387000 -3.27966900
C      0.13490800 -1.86606800 -2.53268900
C      0.53328900 -0.56387000 -3.27966900
C      0.01432100  1.40031900  2.58300200
C      0.00806900  0.69940100  3.78921600
C     -0.00806900 -0.69940100  3.78921600
C     -0.01432100 -1.40031900  2.58300200
H     -0.87858100  2.64253200 -2.75532800
H      0.82083100  2.23898600 -2.92672200
H     -0.75780900  0.84706500 -4.31481100
H     -1.47153000  0.19510700 -2.84928500
H      0.87858100 -2.64253200 -2.75532800
H     -0.82083100 -2.23898600 -2.92672200
H      0.75780900 -0.84706500 -4.31481100
H      1.47153000 -0.19510700 -2.84928500
H      0.02439300  2.48559500  2.57782800
H      0.01453900  1.24427900  4.72854700
H     -0.01453900 -1.24427900  4.72854700
H     -0.02439300 -2.48559500  2.57782800

```

|                         |                     |
|-------------------------|---------------------|
| <b>DFT Theory Level</b> | B3LYP/6-311G++(d,p) |
| <b>Energy (Hartree)</b> | -540.738401         |



Cartesian coordinates of optimized enediyne **15** at B3LYP/6-311G++(d,p) level of theory, in gas phase.

|   |             |             |             |
|---|-------------|-------------|-------------|
| C | 0.00579200  | 0.71387500  | 1.35068200  |
| C | -0.00579200 | -0.71387500 | 1.35068200  |
| C | -0.00579200 | 1.36950200  | 0.08581400  |
| C | 0.00579200  | -1.36950200 | 0.08581400  |
| C | -0.04338200 | 1.67793000  | -1.08145100 |
| C | 0.04338200  | -1.67793000 | -1.08145100 |
| C | -0.14571900 | 1.86568900  | -2.52440200 |
| C | -0.53793600 | 0.55841700  | -3.26258700 |
| C | 0.14571900  | -1.86568900 | -2.52440200 |
| C | 0.53793600  | -0.55841700 | -3.26258700 |
| C | 0.01512400  | 1.39684600  | 2.57296600  |
| C | 0.00841600  | 0.69757900  | 3.77612900  |
| C | -0.00841600 | -0.69757900 | 3.77612900  |
| C | -0.01512400 | -1.39684600 | 2.57296600  |
| H | -0.89595300 | 2.63424700  | -2.74293500 |
| H | 0.80301000  | 2.24508700  | -2.92376100 |
| H | -0.77352300 | 0.83111800  | -4.29583100 |
| H | -1.46709200 | 0.18442300  | -2.82258600 |
| H | 0.89595300  | -2.63424700 | -2.74293500 |
| H | -0.80301000 | -2.24508700 | -2.92376100 |
| H | 0.77352300  | -0.83111800 | -4.29583100 |
| H | 1.46709200  | -0.18442300 | -2.82258600 |
| H | 0.02589400  | 2.48018600  | 2.56821800  |
| H | 0.01528300  | 1.24111400  | 4.71399000  |
| H | -0.01528300 | -1.24111400 | 4.71399000  |
| H | -0.02589400 | -2.48018600 | 2.56821800  |

**ENTRY: G**  
**MOLECULE: 16**

|                  |                   |
|------------------|-------------------|
| DFT Theory Level | B3LYP/6-31G+(d,p) |
|------------------|-------------------|

|                  |             |
|------------------|-------------|
| Energy (Hartree) | -694.287080 |
|------------------|-------------|



Cartesian coordinates of optimized enediyne **16** at B3LYP/6-31G+(d,p) level of theory, in gas phase.

|   |             |             |             |
|---|-------------|-------------|-------------|
| C | 0.12786200  | -0.72589600 | 0.03628500  |
| C | 0.12785300  | 0.72586600  | -0.03636700 |
| C | -1.14335600 | -1.37549300 | 0.05297700  |
| C | -1.14338700 | 1.37542200  | -0.05308800 |
| C | -2.32104400 | -1.67441200 | 0.03803100  |
| C | -2.32104200 | 1.67445200  | -0.03798300 |
| C | -3.76804700 | -1.86934100 | -0.04507600 |
| C | -4.51662700 | -0.58883700 | -0.50555500 |
| C | -3.76804000 | 1.86935800  | 0.04518700  |
| C | -4.51664900 | 0.58882800  | 0.50550500  |
| C | 1.33300000  | -1.40369400 | 0.07323900  |
| C | 2.57437300  | -0.71604400 | 0.03835600  |
| C | 2.57436500  | 0.71604600  | -0.03839300 |
| C | 1.33298500  | 1.40368300  | -0.07326400 |
| C | 3.81898000  | -1.40215000 | 0.07510600  |
| C | 5.00994400  | -0.70784300 | 0.03800200  |
| C | 5.00993700  | 0.70787000  | -0.03797700 |
| C | 3.81896700  | 1.40216600  | -0.07507000 |
| H | -3.99024600 | -2.68164300 | -0.74959300 |
| H | -4.16128900 | -2.19513800 | 0.92807400  |
| H | -5.55169800 | -0.88367100 | -0.71488200 |
| H | -4.08797300 | -0.26554400 | -1.46122900 |
| H | -3.99028500 | 2.68155600  | 0.74981300  |
| H | -4.16128600 | 2.19532300  | -0.92791100 |
| H | -5.55172800 | 0.88369700  | 0.71475800  |
| H | -4.08809800 | 0.26548300  | 1.46120600  |
| H | 1.33065600  | -2.48840200 | 0.12803700  |
| H | 1.33062800  | 2.48839200  | -0.12803300 |
| H | 3.81680400  | -2.48757500 | 0.13299400  |
| H | 5.95364700  | -1.24465500 | 0.06697800  |
| H | 5.95363300  | 1.24469800  | -0.06683300 |
| H | 3.81678100  | 2.48759700  | -0.13286500 |

|                         |                     |
|-------------------------|---------------------|
| <b>DFT Theory Level</b> | B3LYP/6-311G++(d,p) |
| <b>Energy (Hartree)</b> | -694.416454         |



Cartesian coordinates of optimized enediyne **16** at B3LYP/6-311G++(d,p) level of theory, in gas phase.

|   |             |             |             |
|---|-------------|-------------|-------------|
| C | -0.12461500 | -0.72454000 | -0.03729800 |
| C | -0.12461300 | 0.72453200  | 0.03732200  |
| C | 1.14456100  | -1.37094200 | -0.05399700 |
| C | 1.14456500  | 1.37093200  | 0.05403100  |
| C | 2.31325900  | -1.67548900 | -0.03820800 |
| C | 2.31325600  | 1.67549700  | 0.03813400  |
| C | 3.75621100  | -1.86902700 | 0.05008200  |
| C | 4.49846400  | -0.58579300 | 0.50794500  |
| C | 3.75621300  | 1.86902800  | -0.05009700 |
| C | 4.49848600  | 0.58579300  | -0.50792500 |
| C | -1.32664500 | -1.40044700 | -0.07551000 |
| C | -2.56595800 | -0.71438000 | -0.03961400 |
| C | -2.56595600 | 0.71438000  | 0.03961800  |
| C | -1.32664100 | 1.40044300  | 0.07552700  |
| C | -3.80849100 | -1.39895800 | -0.07767000 |
| C | -4.99578600 | -0.70627700 | -0.03935700 |
| C | -4.99578400 | 0.70628500  | 0.03934200  |
| C | -3.80848700 | 1.39896100  | 0.07766500  |
| H | 3.97581700  | -2.67669800 | 0.75774900  |
| H | 4.15230800  | -2.19802000 | -0.91865100 |
| H | 5.53175500  | -0.87331700 | 0.72496700  |
| H | 4.06339900  | -0.25993500 | 1.45737900  |
| H | 3.97586000  | 2.67669800  | -0.75775300 |
| H | 4.15226100  | 2.19802000  | 0.91865600  |
| H | 5.53178700  | 0.87331800  | -0.72490000 |
| H | 4.06346700  | 0.25993400  | -1.45737900 |
| H | -1.32434600 | -2.48314100 | -0.13195500 |
| H | -1.32433900 | 2.48313700  | 0.13197500  |
| H | -3.80689900 | -2.48233800 | -0.13742000 |

|   |             |             |             |
|---|-------------|-------------|-------------|
| H | -5.93821200 | -1.24139600 | -0.06919900 |
| H | -5.93820800 | 1.24140600  | 0.06917700  |
| H | -3.80689200 | 2.48234200  | 0.13741500  |

**ENTRY: H**  
**MOLECULE: 17**

|                         |                   |
|-------------------------|-------------------|
| <b>DFT Theory Level</b> | B3LYP/6-31G+(d,p) |
| <b>Energy (Hartree)</b> | -426.292154       |



Cartesian coordinates of optimized enediyne **17** at B3LYP/6-31G+(d,p) level of theory, in gas phase.

|   |             |             |             |
|---|-------------|-------------|-------------|
| C | -2.52644200 | -1.16281400 | 0.11087300  |
| C | -1.19297000 | -1.61081000 | -0.08454700 |
| C | -0.00968200 | -1.82807900 | -0.27001300 |
| C | 1.43215800  | -1.89335500 | -0.51397700 |
| C | 2.27666600  | -1.02466900 | 0.46467500  |
| C | 1.71900100  | 0.37823200  | 0.76028300  |
| C | 1.57263700  | 1.32078700  | -0.44909500 |
| C | 0.51281600  | 2.43334400  | -0.21954500 |
| C | -0.81922700 | 1.84184900  | -0.07017500 |
| C | -1.81464900 | 1.15120600  | 0.04675500  |
| C | -2.82816100 | 0.16493900  | 0.17097500  |
| H | -3.32261800 | -1.89606500 | 0.21134000  |
| H | 1.61339400  | -1.56588300 | -1.54678400 |
| H | 1.78753300  | -2.92994600 | -0.46303800 |
| H | 3.29261200  | -0.96143800 | 0.05301200  |
| H | 2.35921600  | -1.56134900 | 1.41735300  |
| H | 2.36270100  | 0.85419100  | 1.51197600  |
| H | 0.73763200  | 0.25482800  | 1.22932700  |
| H | 1.27018000  | 0.75851700  | -1.33943200 |
| H | 2.53491900  | 1.79369500  | -0.68390800 |
| H | 0.52390200  | 3.13723800  | -1.06148700 |
| H | 0.76748100  | 3.01953000  | 0.67491900  |
| H | -3.85983800 | 0.47290300  | 0.31946800  |

|                         |                     |
|-------------------------|---------------------|
| <b>DFT Theory Level</b> | B3LYP/6-311G++(d,p) |
| <b>Energy (Hartree)</b> | -426.375595         |

Cartesian coordinates of optimized enediyne **17** at B3LYP/6-311G++(d,p) level of theory, in gas phase.

|   |             |             |             |
|---|-------------|-------------|-------------|
| C | -2.51540400 | -1.16366300 | 0.11169600  |
| C | -1.18441400 | -1.60860200 | -0.08299400 |
| C | -0.00795500 | -1.82060200 | -0.26921100 |
| C | 1.42956600  | -1.88651800 | -0.51409900 |
| C | 2.27525700  | -1.01922400 | 0.46230300  |
| C | 1.71671500  | 0.38101800  | 0.75986700  |
| C | 1.56625900  | 1.32170400  | -0.44855600 |
| C | 0.50248400  | 2.42802400  | -0.21886600 |
| C | -0.82281200 | 1.83182200  | -0.07024200 |
| C | -1.81263600 | 1.14628000  | 0.04599000  |
| C | -2.81979900 | 0.15848000  | 0.17087100  |
| H | -3.30787000 | -1.89810900 | 0.21256900  |
| H | 1.60959700  | -1.56077000 | -1.54564600 |
| H | 1.78243400  | -2.92190000 | -0.46315700 |
| H | 3.28853900  | -0.95365000 | 0.04973300  |
| H | 2.36132000  | -1.55585800 | 1.41241900  |
| H | 2.36029900  | 0.85716700  | 1.50855200  |
| H | 0.73875400  | 0.25685200  | 1.23162200  |
| H | 1.26618000  | 0.75884800  | -1.33686600 |
| H | 2.52501600  | 1.79675900  | -0.68371900 |
| H | 0.50948200  | 3.13086600  | -1.05921500 |
| H | 0.75318900  | 3.01416300  | 0.67435900  |
| H | -3.85050300 | 0.46331700  | 0.31879700  |

**ENTRY: I**

**MOLECULE: 18**

|                         |                   |
|-------------------------|-------------------|
| <b>DFT Theory Level</b> | B3LYP/6-31G+(d,p) |
| <b>Energy (Hartree)</b> | -575.553081       |



Cartesian coordinates of optimized enediyne **18** at B3LYP/6-31G+(d,p) level of theory, in gas phase.

```

C      -3.11377700  0.08209200  0.13978400
C      -2.82866100 -1.24713100  0.16091800
C      -2.12281900  1.08644400 -0.00279100
C      -1.51346600 -1.76514200  0.04822200
C      -1.23693100  1.90842900 -0.13462600
C      -0.36945500 -2.16764100 -0.04216900
C      -0.08223900  2.78840100 -0.30760700
C      1.21801900  2.15486900  0.20519200
C      1.04536100 -2.52338300 -0.14830000
C      1.89695900 -1.38070400 -0.75675100
C      1.87250000 -0.15039600  0.13100800
O      1.45554400  0.94483300 -0.54547000
O      2.18147800 -0.15047100  1.30499500
H     -4.15031300  0.39680800  0.23557400
H     -3.64639000 -1.95526600  0.27392200
H      0.03217300  3.04321600 -1.36943500
H     -0.23099900  3.73532800  0.22829700
H      2.06266900  2.83025800  0.03520400
H      1.15943800  1.91181500  1.26732500
H      1.43742700 -2.76483600  0.84721300
H      1.16661700 -3.42118700 -0.76643900
H      1.54339100 -1.12672700 -1.75778900
H      2.93686800 -1.71932500 -0.82735300

```

|                         |                     |
|-------------------------|---------------------|
| <b>DFT Theory Level</b> | B3LYP/6-311G++(d,p) |
| <b>Energy (Hartree)</b> | -575.678879         |



Cartesian coordinates of optimized enediyne **18** at B3LYP/6-311G++(d,p) level of theory, in gas phase.

|   |             |             |             |
|---|-------------|-------------|-------------|
| C | -3.10900400 | 0.04206800  | 0.14107800  |
| C | -2.80547800 | -1.27809900 | 0.16385100  |
| C | -2.13681800 | 1.05983700  | -0.00212200 |
| C | -1.48711100 | -1.77861700 | 0.05100100  |
| C | -1.26427200 | 1.88517700  | -0.13458100 |
| C | -0.34337300 | -2.15954400 | -0.03862200 |
| C | -0.12527900 | 2.77917800  | -0.30678900 |
| C | 1.18136300  | 2.16332100  | 0.20560700  |
| C | 1.07035800  | -2.50323700 | -0.14523000 |
| C | 1.91209600  | -1.35712600 | -0.75674500 |
| C | 1.88098900  | -0.12704100 | 0.12904000  |
| O | 1.43160300  | 0.95575300  | -0.54335500 |
| O | 2.20740900  | -0.11723100 | 1.29025800  |
| H | -4.14798700 | 0.34167400  | 0.23701400  |
| H | -3.61094100 | -1.99712900 | 0.27790400  |
| H | -0.01490900 | 3.03521800  | -1.36677900 |
| H | -0.28886600 | 3.72169400  | 0.22869900  |
| H | 2.01699500  | 2.84724100  | 0.03749200  |
| H | 1.12476900  | 1.92163700  | 1.26624200  |
| H | 1.46407600  | -2.73971100 | 0.84883200  |
| H | 1.19606900  | -3.40082300 | -0.75945000 |
| H | 1.55489100  | -1.10744900 | -1.75535300 |
| H | 2.95297700  | -1.68603600 | -0.82874800 |

**ENTRY: J**

**MOLECULE: 19**

|                         |                   |
|-------------------------|-------------------|
| <b>DFT Theory Level</b> | B3LYP/6-31G+(d,p) |
| <b>Energy (Hartree)</b> | -1221.957159      |



Cartesian coordinates of optimized enediyne **19** at B3LYP/6-31G+(d,p) level of theory, in gas phase.

```

C      -5.44106900  -0.17326200  -0.62434800
C      -5.05235700  -1.46973500  -0.45266800
C      -4.45083400   0.84310900  -0.66996400
C      -3.67000200  -1.75455300  -0.29561000
C      -3.39747700   1.45261900  -0.67814700
C      -2.46205200  -1.71108700  -0.16405700
C      -2.04319500   1.99649100  -0.72395700
C      -0.97913600   0.89201800  -0.95975200
C      -1.03201100  -1.46165700   0.01261200
N      -0.76922900  -0.01207600   0.18951100
C       2.02575900   0.12734200   0.48503300
C       2.58835000  -1.15316100   0.51996700
C       3.80340100  -1.38143700  -0.12329800
C       4.47356600  -0.35041000  -0.80265100
C       3.89571800   0.92707800  -0.80747500
C       2.67856500   1.17464800  -0.16920900
C       5.77858800  -0.61808700  -1.51365300
S       0.43971400   0.42242300   1.28555200
O       0.33710500  -0.51311600   2.41000900
O       0.31060400   1.87375900   1.45934400
H      -6.49353600   0.07291200  -0.73039400
H      -5.78642400  -2.26914400  -0.42393000
H      -1.95507000   2.72398900  -1.54261600
H      -1.79841500   2.52931800   0.20116100
H      -1.27925100   0.27226900  -1.80924500
H      -0.03541100   1.37865100  -1.23181600
H      -0.67561800  -1.96645600   0.91437300
H      -0.46322900  -1.85861800  -0.84302000
H       2.09761400  -1.94836600   1.07085600
H       4.24585200  -2.37351600  -0.08474900
H       4.40880500   1.74541000  -1.30559600
H       2.25420500   2.17239000  -0.14710800
H       6.41377400  -1.29916500  -0.93866500
H       5.60170400  -1.08444200  -2.49085000
H       6.33763300   0.30589100  -1.68558000

```

|                         |                     |
|-------------------------|---------------------|
| <b>DFT Theory Level</b> | B3LYP/6-311G++(d,p) |
| <b>Energy (Hartree)</b> | -1222.152364        |



Cartesian coordinates of optimized enediyne **19** at B3LYP/6-311G++(d,p) level of theory, in gas phase.

|   |             |             |             |
|---|-------------|-------------|-------------|
| C | -5.42732600 | -0.12941200 | -0.61427000 |
| C | -5.05328300 | -1.42898000 | -0.47493500 |
| C | -4.42852100 | 0.87392500  | -0.64195000 |
| C | -3.67673300 | -1.73089300 | -0.33215900 |
| C | -3.37991900 | 1.47646700  | -0.64404000 |
| C | -2.47523800 | -1.70633600 | -0.20601200 |
| C | -2.02427400 | 2.00628500  | -0.68928700 |
| C | -0.97382500 | 0.89681500  | -0.95107200 |
| C | -1.04570800 | -1.47604100 | -0.03023600 |
| N | -0.76603300 | -0.03405600 | 0.17593500  |
| C | 2.02386200  | 0.11051900  | 0.48637300  |
| C | 2.58752300  | -1.16618900 | 0.48117200  |
| C | 3.80342400  | -1.36948100 | -0.16133300 |
| C | 4.47317800  | -0.31668400 | -0.79952000 |
| C | 3.89528500  | 0.95629900  | -0.76252900 |
| C | 2.67700400  | 1.17888100  | -0.12441800 |
| C | 5.78087900  | -0.55732300 | -1.51144100 |
| S | 0.43188400  | 0.37456300  | 1.28843600  |
| O | 0.33004600  | -0.58864100 | 2.38032300  |
| O | 0.29673500  | 1.81348700  | 1.50140400  |
| H | -6.47561000 | 0.13079900  | -0.70869300 |
| H | -5.79409200 | -2.21995500 | -0.46059900 |
| H | -1.93536000 | 2.74492500  | -1.49536600 |
| H | -1.76983000 | 2.52135800  | 0.24090000  |
| H | -1.28377500 | 0.29944400  | -1.81055000 |
| H | -0.02712200 | 1.37636100  | -1.21835900 |
| H | -0.69398200 | -2.00399300 | 0.85796800  |
| H | -0.48526800 | -1.86072700 | -0.89405700 |
| H | 2.09679700  | -1.97918700 | 1.00161800  |
| H | 4.24726400  | -2.35956500 | -0.15426600 |
| H | 4.40946700  | 1.79099500  | -1.22706700 |
| H | 2.25179500  | 2.17290100  | -0.06883400 |
| H | 6.41252800  | -1.25584100 | -0.95748800 |
| H | 5.60906500  | -0.98941600 | -2.50315800 |
| H | 6.33798800  | 0.37138400  | -1.64844100 |

**ENTRY: K**  
**MOLECULE: 20**

|                         |                   |
|-------------------------|-------------------|
| <b>DFT Theory Level</b> | B3LYP/6-31G+(d,p) |
| <b>Energy (Hartree)</b> | -1375.623155      |



Cartesian coordinates of optimized enediyne **20** at B3LYP/6-31G+(d,p) level of theory, in gas phase.

|   |             |             |             |
|---|-------------|-------------|-------------|
| C | -3.64844400 | 0.07824300  | -0.54001500 |
| C | -3.33565300 | 0.54416300  | 0.77650600  |
| C | -2.74780200 | -0.85394900 | -1.13937100 |
| C | -2.12754200 | 0.06358400  | 1.36694100  |
| C | -1.85194700 | -1.63311700 | -1.39853000 |
| C | -1.06568400 | -0.45919100 | 1.63721900  |
| C | -0.73951600 | -2.57587100 | -1.50273600 |
| C | -0.06433000 | -2.82673900 | -0.13212200 |
| C | 0.22559200  | -1.14094400 | 1.74222300  |
| C | -4.81536600 | 0.54047300  | -1.16727900 |
| C | -5.66291100 | 1.43864600  | -0.51811100 |
| C | -5.35817200 | 1.88917000  | 0.77065100  |
| C | -4.20195900 | 1.44542900  | 1.41289800  |
| N | 0.64318200  | -1.64260800 | 0.40915000  |
| C | 2.61286100  | 0.17132600  | -0.05233300 |
| C | 3.69286000  | 0.73615900  | 0.62683600  |
| C | 3.97944300  | 2.08969700  | 0.43743300  |
| C | 3.20232000  | 2.88433500  | -0.41669600 |
| C | 2.12217900  | 2.28558400  | -1.08778900 |
| C | 1.82295200  | 0.93661100  | -0.91531600 |
| C | 3.49759000  | 4.35429000  | -0.59530400 |
| S | 2.31393500  | -1.59114200 | 0.11921600  |
| O | 3.08111500  | -2.05190100 | 1.28884400  |
| O | 2.49895400  | -2.26087700 | -1.17656800 |
| H | -1.09735900 | -3.54247800 | -1.88250200 |
| H | 0.01798200  | -2.22497700 | -2.21224200 |
| H | 0.62744600  | -3.66760700 | -0.23841600 |

|   |             |             |             |
|---|-------------|-------------|-------------|
| H | -0.82381400 | -3.10903400 | 0.60197100  |
| H | 0.99046500  | -0.44564700 | 2.10259300  |
| H | 0.18501900  | -1.96143800 | 2.47301000  |
| H | -5.05009900 | 0.18633900  | -2.16589600 |
| H | -6.56259200 | 1.78567000  | -1.01737000 |
| H | -6.02000000 | 2.58675400  | 1.27493100  |
| H | -3.95924000 | 1.79385100  | 2.41167400  |
| H | 4.29305000  | 0.12251100  | 1.28971200  |
| H | 4.82118100  | 2.53176000  | 0.96361900  |
| H | 1.50654700  | 2.88400800  | -1.75409900 |
| H | 0.98102400  | 0.48708400  | -1.43049100 |
| H | 4.52399100  | 4.59445400  | -0.30439900 |
| H | 3.35502900  | 4.66583400  | -1.63488800 |
| H | 2.82677400  | 4.96426700  | 0.02244500  |

|                         |                     |
|-------------------------|---------------------|
| <b>DFT Theory Level</b> | B3LYP/6-311G++(d,p) |
| <b>Energy (Hartree)</b> | -1375.844952        |



Cartesian coordinates of optimized enediyne **20** at B3LYP/6-311G++(d,p) level of theory, in gas phase.

|   |             |             |             |
|---|-------------|-------------|-------------|
| C | -3.62287100 | 0.06769700  | -0.53576200 |
| C | -3.31222000 | 0.53880500  | 0.77589800  |
| C | -2.72461200 | -0.86741000 | -1.12625300 |
| C | -2.10862100 | 0.05940300  | 1.36858900  |
| C | -1.83887400 | -1.64723100 | -1.38403400 |
| C | -1.05331800 | -0.45833200 | 1.64171100  |
| C | -0.73414000 | -2.59331500 | -1.48297300 |
| C | -0.05909200 | -2.83513500 | -0.11247400 |
| C | 0.23533000  | -1.13634600 | 1.74916100  |
| C | -4.78530000 | 0.52798800  | -1.16578200 |
| C | -5.62998900 | 1.42905600  | -0.52441600 |
| C | -5.32739000 | 1.88463600  | 0.75914900  |
| C | -4.17629400 | 1.44281600  | 1.40439000  |
| N | 0.65086200  | -1.65042100 | 0.42147900  |
| C | 2.59693300  | 0.18047900  | -0.06041700 |

|   |             |             |             |
|---|-------------|-------------|-------------|
| C | 3.67337000  | 0.75006000  | 0.61294700  |
| C | 3.94619700  | 2.10366200  | 0.42799400  |
| C | 3.15810000  | 2.89268300  | -0.41539000 |
| C | 2.08107900  | 2.28914600  | -1.08019000 |
| C | 1.79566400  | 0.94016800  | -0.91200400 |
| C | 3.43913100  | 4.36408500  | -0.58995600 |
| S | 2.31299500  | -1.58558700 | 0.10934800  |
| O | 3.09821400  | -2.04069600 | 1.26061500  |
| O | 2.48395200  | -2.25033800 | -1.18348400 |
| H | -1.09761400 | -3.55939400 | -1.85340300 |
| H | 0.02215500  | -2.25329000 | -2.19594500 |
| H | 0.62858400  | -3.67797400 | -0.20972100 |
| H | -0.81783400 | -3.10969700 | 0.62237600  |
| H | 0.99835900  | -0.43653500 | 2.09993400  |
| H | 0.19778600  | -1.94737000 | 2.48755200  |
| H | -5.01896500 | 0.16988300  | -2.16114600 |
| H | -6.52656400 | 1.77484500  | -1.02589900 |
| H | -5.98782400 | 2.58484900  | 1.25740100  |
| H | -3.93576200 | 1.79523700  | 2.40019500  |
| H | 4.28164200  | 0.13968100  | 1.26836700  |
| H | 4.78627700  | 2.54997500  | 0.94927200  |
| H | 1.45687200  | 2.88411000  | -1.73849300 |
| H | 0.95519700  | 0.48635200  | -1.42187900 |
| H | 4.46376600  | 4.61124500  | -0.30605900 |
| H | 3.28582300  | 4.67759500  | -1.62540100 |
| H | 2.76830900  | 4.96361200  | 0.03476100  |

**ENTRY: L**  
**MOLECULE: 21**



|                         |                   |
|-------------------------|-------------------|
| <b>DFT Theory Level</b> | B3LYP/6-31G+(d,p) |
| <b>Energy (Hartree)</b> | -616.032216       |

Cartesian coordinates of optimized enediyne **21** at B3LYP/6-31G+(d,p) level of theory, in gas phase.

|   |            |             |             |
|---|------------|-------------|-------------|
| C | 3.49296600 | -0.91367700 | 0.18808400  |
| C | 3.53162400 | 0.17832500  | -0.62961800 |

|   |             |             |             |
|---|-------------|-------------|-------------|
| C | 2.23110400  | -1.40245300 | 0.62137900  |
| C | 2.31505400  | 0.80167800  | -1.01347800 |
| C | 1.03756100  | -1.56236400 | 0.79794500  |
| C | 1.14111700  | 1.09430300  | -1.15271200 |
| C | -0.41331100 | -1.67982600 | 0.90819900  |
| C | -1.21069800 | -0.85686600 | -0.15571400 |
| C | -0.29218000 | 1.36965200  | -1.21656200 |
| C | -1.13668000 | 0.70805300  | -0.08355700 |
| C | -2.67581600 | -1.31284300 | -0.09244900 |
| C | -0.76295100 | 1.25144000  | 1.29641600  |
| O | -3.35967700 | -0.78550000 | -1.23067500 |
| O | -1.01609400 | 2.66160500  | 1.29128900  |
| H | 4.41210900  | -1.40240600 | 0.49733000  |
| H | 4.48456800  | 0.56624300  | -0.97839500 |
| H | -0.69247400 | -2.73517600 | 0.78553400  |
| H | -0.73482700 | -1.40879200 | 1.92284100  |
| H | -0.83430500 | -1.16560300 | -1.13810800 |
| H | -0.46193700 | 2.45124600  | -1.16720100 |
| H | -0.69231400 | 1.03306800  | -2.18176100 |
| H | -2.15388200 | 1.06546800  | -0.28106100 |
| H | -2.72414400 | -2.41134900 | -0.09736800 |
| H | -3.14260500 | -0.95596100 | 0.83972900  |
| H | -1.38133600 | 0.76787200  | 2.06741500  |
| H | 0.29149900  | 1.04877000  | 1.52125500  |
| H | -4.30316900 | -0.97284300 | -1.15308900 |
| H | -0.60776900 | 3.05809600  | 2.07037100  |

|                         |                     |
|-------------------------|---------------------|
| <b>DFT Theory Level</b> | B3LYP/6-311G++(d,p) |
| <b>Energy (Hartree)</b> | -616.167174         |



Cartesian coordinates of optimized enediyne **21** at B3LYP/6-311G++(d,p) level of theory, in gas phase.

|   |            |             |             |
|---|------------|-------------|-------------|
| C | 3.47533500 | -0.91254300 | 0.18179500  |
| C | 3.51158900 | 0.17175300  | -0.63800900 |
| C | 2.21717400 | -1.39664600 | 0.61888000  |
| C | 2.29634800 | 0.79161900  | -1.01816200 |
| C | 1.03443700 | -1.56552100 | 0.80670700  |

|   |             |             |             |
|---|-------------|-------------|-------------|
| C | 1.13336400  | 1.09438500  | -1.16068500 |
| C | -0.41325600 | -1.67816900 | 0.91536900  |
| C | -1.20441600 | -0.85549000 | -0.15104300 |
| C | -0.29621200 | 1.37069400  | -1.21526900 |
| C | -1.13103300 | 0.70825200  | -0.07755000 |
| C | -2.66771700 | -1.31086500 | -0.09647500 |
| C | -0.74574200 | 1.24989000  | 1.29768400  |
| O | -3.34844700 | -0.77763000 | -1.23313600 |
| O | -0.99906500 | 2.65990200  | 1.29709700  |
| H | 4.39305500  | -1.40034600 | 0.49021400  |
| H | 4.46124800  | 0.55788600  | -0.99191500 |
| H | -0.69484400 | -2.73105900 | 0.79382500  |
| H | -0.73433500 | -1.40499500 | 1.92745900  |
| H | -0.82243500 | -1.16263500 | -1.12938200 |
| H | -0.46411900 | 2.45052200  | -1.16368800 |
| H | -0.70217800 | 1.03664200  | -2.17673400 |
| H | -2.14838800 | 1.06414900  | -0.26461400 |
| H | -2.71516500 | -2.40736900 | -0.10817400 |
| H | -3.13744300 | -0.96034800 | 0.83439400  |
| H | -1.35575900 | 0.76668300  | 2.07261700  |
| H | 0.30894000  | 1.04852300  | 1.51278700  |
| H | -4.28748100 | -0.97016700 | -1.15728200 |
| H | -0.58021900 | 3.05018000  | 2.06935400  |

**ENTRY: M**

**MOLECULE: 22**



|                         |                   |
|-------------------------|-------------------|
| <b>DFT Theory Level</b> | B3LYP/6-31G+(d,p) |
| <b>Energy (Hartree)</b> | -694.665975       |

Cartesian coordinates of optimized enediyne **22** at B3LYP/6-31G+(d,p) level of theory, in gas phase.

|   |            |            |             |
|---|------------|------------|-------------|
| C | 1.43206800 | 3.09675500 | -0.29832400 |
| C | 0.12453500 | 3.40423300 | -0.06086600 |
| C | 1.83276400 | 1.73474800 | -0.35241500 |

|   |             |             |             |
|---|-------------|-------------|-------------|
| C | -0.82879600 | 2.36228200  | 0.08666900  |
| C | 1.90278000  | 0.52012000  | -0.31505800 |
| C | -1.41526700 | 1.29828100  | 0.16296800  |
| C | 1.81588000  | -0.93381500 | -0.11614200 |
| C | 0.40524900  | -1.26925700 | 0.51769600  |
| C | -1.98008300 | -0.05404700 | 0.04869700  |
| C | -0.80215800 | -0.99564200 | -0.43167500 |
| O | 0.22172200  | -0.59994100 | 1.75853200  |
| O | -1.28599700 | -2.30609400 | -0.76367400 |
| C | -3.03988800 | -0.01582000 | -1.09092300 |
| C | -2.68060100 | -0.53376300 | 1.34030000  |
| C | 2.00763100  | -1.70548700 | -1.44428500 |
| C | 2.92741500  | -1.38960200 | 0.86539100  |
| H | 2.16320000  | 3.88877200  | -0.43356400 |
| H | -0.18721500 | 4.44360300  | -0.00441800 |
| H | 0.39947400  | -2.35599300 | 0.68064400  |
| H | -0.42084200 | -0.51639100 | -1.34112600 |
| H | 0.89071900  | -0.90675500 | 2.38199300  |
| H | -1.85423300 | -2.24644400 | -1.54211300 |
| H | -2.58567200 | 0.23780900  | -2.05523900 |
| H | -3.55961400 | -0.97701800 | -1.17404200 |
| H | -3.79271500 | 0.74486400  | -0.86804600 |
| H | -2.96933500 | -1.58369400 | 1.22735600  |
| H | -3.58647000 | 0.05748800  | 1.50914500  |
| H | -2.02718600 | -0.43889300 | 2.20507500  |
| H | 1.88764900  | -2.78122500 | -1.27749800 |
| H | 3.01230200  | -1.52445700 | -1.83722300 |
| H | 1.29124600  | -1.39723000 | -2.20882400 |
| H | 2.90310200  | -0.82748200 | 1.80388600  |
| H | 2.82835100  | -2.45990800 | 1.08278300  |
| H | 3.91227000  | -1.22269900 | 0.42014900  |

|                         |                     |
|-------------------------|---------------------|
| <b>DFT Theory Level</b> | B3LYP/6-311G++(d,p) |
| <b>Energy (Hartree)</b> | -694.813768         |



Cartesian coordinates of optimized enediyne **22** at B3LYP/6-311G++(d,p) level of theory, in gas phase.

|   |             |             |             |
|---|-------------|-------------|-------------|
| C | 1.41751900  | 3.08951900  | -0.30019700 |
| C | 0.11428700  | 3.39262700  | -0.06112700 |
| C | 1.81985300  | 1.73180600  | -0.35470900 |
| C | -0.83295500 | 2.35032700  | 0.08793500  |
| C | 1.89789900  | 0.52506700  | -0.31795000 |
| C | -1.41595500 | 1.29287700  | 0.16398900  |
| C | 1.81733500  | -0.92524200 | -0.11681100 |
| C | 0.40960900  | -1.26530400 | 0.51799200  |
| C | -1.97651700 | -0.05703000 | 0.04920300  |
| C | -0.79876900 | -0.99750800 | -0.42991700 |
| O | 0.22451000  | -0.59778500 | 1.75830000  |
| O | -1.28233800 | -2.30745400 | -0.76137000 |
| C | -3.03336800 | -0.02108000 | -1.09115600 |
| C | -2.67585800 | -0.53801600 | 1.33926500  |
| C | 2.01102400  | -1.69707600 | -1.44256200 |
| C | 2.92917800  | -1.37325800 | 0.86549700  |
| H | 2.14572600  | 3.88151000  | -0.43643500 |
| H | -0.20010800 | 4.42921900  | -0.00394600 |
| H | 0.40775800  | -2.34994800 | 0.68123800  |
| H | -0.41926400 | -0.51937900 | -1.33808200 |
| H | 0.90979500  | -0.88306500 | 2.36918500  |
| H | -1.85031300 | -2.24416200 | -1.53549300 |
| H | -2.57878400 | 0.23764300  | -2.05176600 |
| H | -3.54653100 | -0.98336300 | -1.17874300 |
| H | -3.78916600 | 0.73370000  | -0.86754600 |
| H | -2.96122000 | -1.58716800 | 1.22796000  |
| H | -3.58221100 | 0.04949100  | 1.50708900  |
| H | -2.02445000 | -0.44006100 | 2.20263500  |
| H | 1.89944900  | -2.77178800 | -1.27500100 |
| H | 3.01177000  | -1.50970200 | -1.83755500 |
| H | 1.29179700  | -1.39447700 | -2.20412400 |
| H | 2.89978700  | -0.81091300 | 1.80175900  |
| H | 2.83706500  | -2.44198200 | 1.08415900  |
| H | 3.91184000  | -1.19989000 | 0.42251200  |

**ENTRY: N**

**MOLECULE: 23**

|                  |                   |
|------------------|-------------------|
| DFT Theory Level | B3LYP/6-31G+(d,p) |
| Energy (Hartree) | -694.678057       |



Cartesian coordinates of optimized enediyne **23** at B3LYP/6-31G+(d,p) level of theory, in gas phase.

|   |             |             |             |
|---|-------------|-------------|-------------|
| C | 0.66127300  | 3.45789700  | -0.12421300 |
| C | -0.67319000 | 3.45024900  | 0.15911000  |
| C | 1.35861800  | 2.22702500  | -0.25355600 |
| C | -1.36462900 | 2.21467200  | 0.27110600  |
| C | 1.71656700  | 1.06326000  | -0.28295900 |
| C | -1.71956300 | 1.04914000  | 0.27742500  |
| C | 1.94799200  | -0.37920900 | -0.09902300 |
| C | 0.59638200  | -0.94062000 | 0.48943100  |
| C | -1.95392800 | -0.38917500 | 0.07082600  |
| C | -0.60048700 | -0.96656400 | -0.51591000 |
| O | -0.78959800 | -2.26914200 | -1.04159100 |
| O | 0.76204700  | -2.28841000 | 0.96171100  |
| C | -2.38282400 | -1.10129600 | 1.37255100  |
| C | -3.06286000 | -0.56802800 | -0.99627300 |
| C | 2.35075300  | -1.08550200 | -1.41266200 |
| C | 3.07596000  | -0.56939800 | 0.94707000  |
| H | 1.19034600  | 4.40038600  | -0.23291300 |
| H | -1.20836100 | 4.38820900  | 0.27864800  |
| H | 0.33626300  | -0.29306000 | 1.33291000  |
| H | -0.35633100 | -0.32163100 | -1.36501400 |
| H | -0.46999900 | -2.89839900 | -0.37538300 |
| H | 1.07117800  | -2.28073900 | 1.87458600  |
| H | -2.48484300 | -2.17570300 | 1.19110900  |
| H | -3.35009700 | -0.71758800 | 1.71060300  |
| H | -1.66500300 | -0.95039600 | 2.18390300  |
| H | -2.78058800 | -0.08669300 | -1.93753900 |
| H | -3.22566300 | -1.63113600 | -1.18765900 |
| H | -3.99613600 | -0.11647700 | -0.64700900 |
| H | 2.44749100  | -2.16097900 | -1.23847100 |
| H | 3.31245100  | -0.69998800 | -1.76450000 |
| H | 1.61373700  | -0.93139700 | -2.20369100 |
| H | 2.80174400  | -0.12828200 | 1.91197400  |
| H | 3.29319900  | -1.63302400 | 1.08484700  |
| H | 3.99061600  | -0.07737900 | 0.60509800  |

|                         |                     |
|-------------------------|---------------------|
| <b>DFT Theory Level</b> | B3LYP/6-311G++(d,p) |
|-------------------------|---------------------|

|                  |             |
|------------------|-------------|
| Energy (Hartree) | -694.825619 |
|------------------|-------------|



Cartesian coordinates of optimized enediyne **23** at B3LYP/6-311G++(d,p) level of theory, in gas phase.

|   |             |             |             |
|---|-------------|-------------|-------------|
| C | 0.64323900  | 3.44996100  | -0.12414300 |
| C | -0.68613600 | 3.43660700  | 0.15973700  |
| C | 1.34341300  | 2.22474900  | -0.25402100 |
| C | -1.36974600 | 2.20065200  | 0.27186900  |
| C | 1.70585300  | 1.07012100  | -0.28271300 |
| C | -1.71821900 | 1.04090200  | 0.27664000  |
| C | 1.94680200  | -0.36661600 | -0.09967600 |
| C | 0.60089600  | -0.93902300 | 0.48868500  |
| C | -1.94946600 | -0.39370200 | 0.07148100  |
| C | -0.59606700 | -0.96977100 | -0.51456700 |
| O | -0.78354400 | -2.27285800 | -1.03668800 |
| O | 0.77643100  | -2.28576000 | 0.95856200  |
| C | -2.37604800 | -1.10619700 | 1.37190500  |
| C | -3.05599100 | -0.57466300 | -0.99581100 |
| C | 2.35162200  | -1.06992900 | -1.41238900 |
| C | 3.07505800  | -0.54909400 | 0.94535600  |
| H | 1.16810300  | 4.39262900  | -0.23315500 |
| H | -1.22512600 | 4.37012700  | 0.27994800  |
| H | 0.33798200  | -0.29603300 | 1.33199500  |
| H | -0.35412400 | -0.32616500 | -1.36255200 |
| H | -0.45326700 | -2.89566300 | -0.37445800 |
| H | 1.08976600  | -2.27434900 | 1.86634700  |
| H | -2.47790100 | -2.17886800 | 1.19106900  |
| H | -3.34141600 | -0.72365400 | 1.71109900  |
| H | -1.65803400 | -0.95501500 | 2.18060700  |
| H | -2.77547600 | -0.08920900 | -1.93338300 |
| H | -3.21363700 | -1.63594500 | -1.19084800 |
| H | -3.98998000 | -0.12916200 | -0.64630400 |
| H | 2.45729800  | -2.14283800 | -1.23862700 |
| H | 3.30756200  | -0.67775800 | -1.76710000 |
| H | 1.61190000  | -0.92201200 | -2.19967900 |

|   |            |             |            |
|---|------------|-------------|------------|
| H | 2.79815900 | -0.10966500 | 1.90815600 |
| H | 3.29892400 | -1.60924900 | 1.08427800 |
| H | 3.98491400 | -0.05220700 | 0.60349500 |

**ENTRY: O**  
**MOLECULE: 24**

|                         |                   |
|-------------------------|-------------------|
| <b>DFT Theory Level</b> | B3LYP/6-31G+(d,p) |
| <b>Energy (Hartree)</b> | -1091.407949      |



Cartesian coordinates of optimized enediyne **24** at B3LYP/6-31G+(d,p) level of theory, in gas phase.

|   |             |             |             |
|---|-------------|-------------|-------------|
| C | -2.50930700 | 2.90352800  | -0.83090900 |
| C | -1.86793300 | 3.40150400  | 0.26381700  |
| C | -2.25323200 | 1.56868200  | -1.24740300 |
| C | -0.96807000 | 2.57094100  | 0.98429400  |
| C | -0.27557200 | 1.68103100  | 1.44153800  |
| C | -1.86370200 | 0.42862600  | -1.41936600 |
| C | 0.38963800  | 0.41235100  | 1.76577800  |
| C | -0.30194700 | -0.64916100 | 0.90193000  |
| C | -1.37534600 | -1.31705300 | 1.38591000  |
| C | -2.26739800 | -2.12347800 | 0.53340000  |
| O | -3.16817900 | -2.80428200 | 1.01012200  |
| C | -2.05727000 | -2.06127300 | -0.97900200 |
| C | -1.17825500 | -0.87266500 | -1.44990100 |
| C | 0.05070000  | -0.79492100 | -0.53371800 |
| C | 1.29047900  | -0.93577400 | -1.03821400 |
| H | -0.84512300 | -1.07817500 | -2.47418100 |
| H | 1.38908700  | -1.00704200 | -2.12023100 |
| C | 2.57573400  | -1.06281000 | -0.27742600 |
| S | 3.57332500  | 0.49059500  | -0.40296900 |
| C | 5.16833500  | -0.12015800 | 0.24873000  |
| H | -3.20393900 | 3.52552300  | -1.38817300 |
| H | -2.04739800 | 4.42320100  | 0.58608400  |
| H | 0.27336900  | 0.16666100  | 2.82781500  |

|   |             |             |             |
|---|-------------|-------------|-------------|
| H | 1.46089200  | 0.49432300  | 1.55595500  |
| H | -1.67698500 | -1.22516400 | 2.42618900  |
| H | -3.04113000 | -2.05064900 | -1.45594200 |
| H | -1.56174300 | -2.99623300 | -1.27266300 |
| H | 2.40830400  | -1.31080700 | 0.77447000  |
| H | 3.17213300  | -1.86836000 | -0.72063600 |
| H | 5.86008600  | 0.72518500  | 0.22844800  |
| H | 5.57206400  | -0.92050900 | -0.37796100 |
| H | 5.07148500  | -0.46944100 | 1.28060100  |

|                         |                     |
|-------------------------|---------------------|
| <b>DFT Theory Level</b> | B3LYP/6-311G++(d,p) |
| <b>Energy (Hartree)</b> | -1091.573622        |



Cartesian coordinates of optimized enediyne **24** at B3LYP/6-311G++(d,p) level of theory, in gas phase.

|   |             |             |             |
|---|-------------|-------------|-------------|
| C | -2.51389900 | 2.89035700  | -0.82508800 |
| C | -1.87441100 | 3.39063100  | 0.26378500  |
| C | -2.25419800 | 1.55985300  | -1.24120700 |
| C | -0.97127900 | 2.56757000  | 0.98206900  |
| C | -0.28069400 | 1.68323400  | 1.43300500  |
| C | -1.86261700 | 0.42844100  | -1.41308000 |
| C | 0.38809700  | 0.42120100  | 1.75743300  |
| C | -0.30003100 | -0.64481500 | 0.89875500  |
| C | -1.36584500 | -1.31431400 | 1.38343200  |
| C | -2.25453000 | -2.12806100 | 0.53548600  |
| O | -3.14087800 | -2.81505800 | 1.01156700  |
| C | -2.05192300 | -2.05753000 | -0.97714100 |
| C | -1.17712600 | -0.86818100 | -1.44827300 |
| C | 0.05205900  | -0.79125000 | -0.53522100 |
| C | 1.28752200  | -0.93389400 | -1.03667700 |
| H | -0.84581800 | -1.06918100 | -2.47177600 |
| H | 1.38822200  | -1.00932000 | -2.11644000 |
| C | 2.56833000  | -1.05898500 | -0.27304800 |

|   |             |             |             |
|---|-------------|-------------|-------------|
| S | 3.56679700  | 0.49179300  | -0.40871800 |
| C | 5.15812400  | -0.11343800 | 0.25394300  |
| H | -3.21148200 | 3.50758600  | -1.38032000 |
| H | -2.05728300 | 4.41009800  | 0.58481900  |
| H | 0.27591300  | 0.17879700  | 2.81862800  |
| H | 1.45658800  | 0.50649200  | 1.54423900  |
| H | -1.66634200 | -1.22247400 | 2.42231500  |
| H | -3.03691200 | -2.04549000 | -1.44729700 |
| H | -1.55997800 | -2.99053400 | -1.27586800 |
| H | 2.40056600  | -1.29606100 | 0.77884000  |
| H | 3.16554300  | -1.86461100 | -0.70928100 |
| H | 5.84725400  | 0.73135500  | 0.23019000  |
| H | 5.56193400  | -0.91598800 | -0.36592200 |
| H | 5.05457600  | -0.45380500 | 1.28578200  |

**ENTRY: P**  
**MOLECULE: 25**

|                         |                   |
|-------------------------|-------------------|
| <b>DFT Theory Level</b> | B3LYP/6-31G+(d,p) |
| <b>Energy (Hartree)</b> | -1052.099296      |



Cartesian coordinates of optimized enediyne **25** at B3LYP/6-31G+(d,p) level of theory, in gas phase.

|   |             |             |             |
|---|-------------|-------------|-------------|
| C | -3.77223500 | -0.72899000 | 0.68752400  |
| C | -3.56120500 | -1.50745600 | -0.41347400 |
| C | -2.65968700 | -0.05268000 | 1.25354100  |
| C | -2.23970100 | -1.62951500 | -0.91681400 |
| C | -1.03146800 | -1.54577600 | -1.04086100 |
| C | -1.53203900 | 0.36573000  | 1.43874900  |
| C | 0.42580500  | -1.49725800 | -1.08588000 |
| C | 1.12657900  | -0.19849500 | -0.53365900 |
| C | 0.76690700  | 1.04121200  | -1.39834400 |
| C | -0.24783600 | 2.01975000  | -0.80968200 |
| O | -1.02128100 | 2.62792200  | -1.52516200 |
| C | -0.15940200 | 2.27657200  | 0.68646500  |
| C | -0.18740400 | 0.94533100  | 1.49806000  |

|   |             |             |             |
|---|-------------|-------------|-------------|
| C | 0.93598000  | 0.04909900  | 0.97035000  |
| C | 1.90726400  | -0.41723800 | 1.76348700  |
| C | 3.10225500  | -1.04714400 | 1.10613200  |
| S | 2.96778700  | -0.56380100 | -0.66643300 |
| H | 0.05416200  | 1.18132800  | 2.54137600  |
| H | -4.76772400 | -0.61551200 | 1.10494400  |
| H | -4.38749100 | -2.02708200 | -0.88894700 |
| H | 0.77548000  | -1.62493700 | -2.11729200 |
| H | 0.82030800  | -2.35327600 | -0.52529100 |
| H | 1.67558700  | 1.64234600  | -1.53885600 |
| H | 0.41578900  | 0.75209000  | -2.39206600 |
| H | -0.97614400 | 2.93757600  | 0.98271100  |
| H | 0.79643300  | 2.78014800  | 0.88711300  |
| H | 1.87329600  | -0.32638000 | 2.84688500  |
| H | 3.12328100  | -2.13795800 | 1.22347500  |
| H | 4.03979400  | -0.64974900 | 1.50661800  |

|                         |                     |
|-------------------------|---------------------|
| <b>DFT Theory Level</b> | B3LYP/6-311G++(d,p) |
| <b>Energy (Hartree)</b> | -1052.257496        |



Cartesian coordinates of optimized enediyne **25** at B3LYP/6-311G++(d,p) level of theory, in gas phase.

|   |             |             |             |
|---|-------------|-------------|-------------|
| C | -3.75746800 | -0.72541100 | 0.68487900  |
| C | -3.54567000 | -1.50995800 | -0.40551700 |
| C | -2.64644200 | -0.04979100 | 1.24533700  |
| C | -2.22586800 | -1.63456200 | -0.90197700 |
| C | -1.02619400 | -1.55807800 | -1.03789400 |
| C | -1.53160700 | 0.37777900  | 1.43644800  |
| C | 0.42745700  | -1.50380000 | -1.07969700 |
| C | 1.11964000  | -0.20044100 | -0.53305500 |
| C | 0.75648300  | 1.03264000  | -1.40169300 |
| C | -0.25326300 | 2.01719500  | -0.81530300 |
| O | -1.02693600 | 2.61711600  | -1.52484700 |
| C | -0.15441100 | 2.27810100  | 0.67867200  |
| C | -0.18831900 | 0.95112700  | 1.49362600  |
| C | 0.93051000  | 0.04972100  | 0.96927700  |
| C | 1.89761600  | -0.41437600 | 1.76081600  |
| C | 3.09164300  | -1.04421200 | 1.10661600  |
| S | 2.96314800  | -0.55498800 | -0.66327300 |

|   |             |             |             |
|---|-------------|-------------|-------------|
| H | 0.05324500  | 1.18808200  | 2.53450200  |
| H | -4.75147000 | -0.60695000 | 1.09968300  |
| H | -4.36905500 | -2.03185500 | -0.87935600 |
| H | 0.77901200  | -1.63566500 | -2.10797100 |
| H | 0.82301800  | -2.35384300 | -0.51449600 |
| H | 1.66332400  | 1.63087300  | -1.55107500 |
| H | 0.40014600  | 0.73862500  | -2.38990900 |
| H | -0.96362900 | 2.94448100  | 0.97643200  |
| H | 0.80417300  | 2.77525800  | 0.87120500  |
| H | 1.86444400  | -0.31928400 | 2.84189100  |
| H | 3.11033700  | -2.13336000 | 1.21855600  |
| H | 4.02692100  | -0.64910100 | 1.50846900  |

**ENTRY: Q**  
**MOLECULE: 26**

|                         |                   |
|-------------------------|-------------------|
| <b>DFT Theory Level</b> | B3LYP/6-31G+(d,p) |
| <b>Energy (Hartree)</b> | -708.002558       |



Cartesian coordinates of optimized enediyne **26** at B3LYP/6-31G+(d,p) level of theory, in gas phase.

|   |             |             |             |
|---|-------------|-------------|-------------|
| N | -0.61416200 | 2.66336600  | -0.01373200 |
| C | -0.42262000 | 2.29161500  | 1.31195300  |
| C | -0.58284400 | 1.02528100  | 1.73906500  |
| C | -1.05256700 | -0.00720300 | 0.78435100  |
| C | -1.11626700 | 0.31937200  | -0.64876000 |
| C | -0.41647100 | 1.63962100  | -1.05188100 |
| C | -0.76896700 | -1.47764900 | 1.14986600  |
| C | -1.33446900 | -2.45035200 | 0.12828600  |
| C | -1.47952700 | -2.12182500 | -1.15886900 |
| C | -1.13028300 | -0.76782600 | -1.71387800 |
| O | -2.31728000 | 0.35061400  | 0.12816700  |
| C | 1.01489700  | 1.26522400  | -1.18161800 |
| C | 2.10891200  | 0.78037400  | -0.94684300 |

|   |             |             |             |
|---|-------------|-------------|-------------|
| C | 3.25802400  | 0.05121400  | -0.54503300 |
| C | 3.14463600  | -0.99967300 | 0.32123500  |
| C | 1.87787500  | -1.39472000 | 0.81962300  |
| C | 0.70782900  | -1.55476900 | 1.12155900  |
| H | -0.22146800 | 3.56156800  | -0.26332900 |
| H | -0.16506200 | 3.09997500  | 1.98906300  |
| H | -0.45100800 | 0.77056100  | 2.78404600  |
| H | -0.82472900 | 2.03233000  | -1.98989600 |
| H | -1.16162200 | -1.70433700 | 2.14940200  |
| H | -1.58280900 | -3.44753600 | 0.48044600  |
| H | -1.86480900 | -2.85927200 | -1.85928300 |
| H | -1.86176300 | -0.47931900 | -2.48205600 |
| H | -0.15297700 | -0.80840400 | -2.21404200 |
| H | 4.23676000  | 0.33239900  | -0.92391700 |
| H | 4.03791400  | -1.53854300 | 0.62602400  |

|                         |                     |
|-------------------------|---------------------|
| <b>DFT Theory Level</b> | B3LYP/6-311G++(d,p) |
| <b>Energy (Hartree)</b> | -708.145531         |



Cartesian coordinates of optimized enediyne **26** at B3LYP/6-311G++(d,p) level of theory, in gas phase.

|   |             |             |             |
|---|-------------|-------------|-------------|
| N | -0.62526400 | 2.65801100  | -0.02324600 |
| C | -0.44224900 | 2.29150000  | 1.30316700  |
| C | -0.59795900 | 1.03009300  | 1.73254900  |
| C | -1.05575700 | -0.00804600 | 0.78056800  |
| C | -1.11438800 | 0.31186300  | -0.65172600 |
| C | -0.41455600 | 1.63067200  | -1.05487500 |
| C | -0.76054000 | -1.47405000 | 1.14946100  |
| C | -1.32268700 | -2.45166100 | 0.13246100  |
| C | -1.46338700 | -2.13021900 | -1.15166200 |
| C | -1.11403200 | -0.77968000 | -1.70982800 |
| O | -2.31671100 | 0.33920600  | 0.11712600  |
| C | 1.01419800  | 1.26022300  | -1.16811900 |
| C | 2.10723400  | 0.78915200  | -0.94063100 |
| C | 3.25300000  | 0.06198900  | -0.53636700 |

|   |             |             |             |
|---|-------------|-------------|-------------|
| C | 3.13985200  | -0.98469800 | 0.32739700  |
| C | 1.87668900  | -1.38303300 | 0.82299400  |
| C | 0.71233900  | -1.54180000 | 1.11724300  |
| H | -0.23730400 | 3.55642600  | -0.27231900 |
| H | -0.19548500 | 3.10212900  | 1.97875900  |
| H | -0.47365500 | 0.78154100  | 2.77791000  |
| H | -0.81429400 | 2.01595100  | -1.99729600 |
| H | -1.14818700 | -1.69986800 | 2.14880300  |
| H | -1.57129400 | -3.44541900 | 0.48826500  |
| H | -1.84580300 | -2.86932800 | -1.84901500 |
| H | -1.83811900 | -0.49823600 | -2.48493400 |
| H | -0.13410100 | -0.81919200 | -2.20075400 |
| H | 4.23039800  | 0.34382500  | -0.91279400 |
| H | 4.03183800  | -1.52139600 | 0.63329500  |

**ENTRY: R**  
**MOLECULE: 27**

|                         |                   |
|-------------------------|-------------------|
| <b>DFT Theory Level</b> | B3LYP/6-31G+(d,p) |
| <b>Energy (Hartree)</b> | -1146.737304      |



Cartesian coordinates of optimized enediyne **27** at B3LYP/6-31G+(d,p) level of theory, in gas phase.

|   |             |             |             |
|---|-------------|-------------|-------------|
| N | -0.34675400 | 2.67856900  | -0.00212800 |
| C | -0.25586900 | 2.20579400  | -1.30673400 |
| C | 0.19639300  | 0.97418600  | -1.59670000 |
| C | 0.79893700  | 0.05404300  | -0.56341300 |
| C | 0.54595400  | 0.55847000  | 0.94194100  |
| C | -0.60877800 | 1.64139900  | 1.00776000  |
| C | 0.35086200  | -1.44093100 | -0.81113800 |
| C | 0.80761300  | -2.35505500 | 0.31281000  |

|   |             |             |             |
|---|-------------|-------------|-------------|
| C | 0.76281200  | -1.93450500 | 1.57928200  |
| C | 0.22182300  | -0.58167700 | 1.94280200  |
| O | 1.69676300  | 1.20301400  | 1.47646200  |
| C | -1.96107100 | 1.08449800  | 0.85312300  |
| C | -3.04248500 | 0.59520000  | 0.57807200  |
| C | -4.06029000 | -0.24664000 | 0.05944100  |
| C | -3.69959700 | -1.31992900 | -0.70535100 |
| C | -2.32541900 | -1.58097900 | -0.93473700 |
| C | -1.10789900 | -1.54583300 | -0.94808700 |
| H | -0.92613700 | 3.50047700  | 0.10853300  |
| H | -0.57399000 | 2.88891000  | -2.08869700 |
| H | 0.24320600  | 0.65555800  | -2.63204300 |
| H | -0.49481500 | 2.10135600  | 1.99450200  |
| H | 0.81975000  | -1.74692300 | -1.75350000 |
| H | 1.14342200  | -3.35547100 | 0.05367700  |
| H | 1.07403600  | -2.59325300 | 2.38686500  |
| H | 0.60699600  | -0.25712300 | 2.91418700  |
| H | -0.86772300 | -0.67019500 | 2.04614900  |
| H | -5.10763600 | -0.04154000 | 0.25953900  |
| H | -4.46093400 | -1.97019500 | -1.12694000 |
| H | 2.19483200  | 1.60626800  | 0.74422900  |
| S | 2.62061600  | 0.23002800  | -1.06962300 |
| C | 3.64900400  | -0.91074400 | -0.06593300 |
| H | 3.45974400  | -1.95692200 | -0.30930700 |
| H | 4.67871700  | -0.66087700 | -0.33946300 |
| H | 3.50192300  | -0.73840500 | 1.00061100  |

|                         |                     |
|-------------------------|---------------------|
| <b>DFT Theory Level</b> | B3LYP/6-311G++(d,p) |
| <b>Energy (Hartree)</b> | -1146.916458        |



Cartesian coordinates of optimized enediyne **27** at B3LYP/6-311G++(d,p) level of theory, in gas phase.

|   |             |             |             |
|---|-------------|-------------|-------------|
| N | -0.35029600 | 2.67710700  | -0.00390700 |
| C | -0.25782700 | 2.20164200  | -1.30556600 |
| C | 0.19428500  | 0.97439500  | -1.59359700 |
| C | 0.79538800  | 0.05594600  | -0.56087000 |
| C | 0.53983100  | 0.55890700  | 0.94347800  |
| C | -0.61363800 | 1.64176400  | 1.00675100  |
| C | 0.35391000  | -1.43927100 | -0.80960300 |
| C | 0.80701800  | -2.35043600 | 0.31632200  |
| C | 0.75503600  | -1.93163400 | 1.57765600  |
| C | 0.20991900  | -0.58193700 | 1.93894800  |
| O | 1.68839100  | 1.20249000  | 1.48151600  |
| C | -1.96212500 | 1.08652900  | 0.85070100  |
| C | -3.02961500 | 0.58718200  | 0.57313600  |
| C | -4.04404600 | -0.25253600 | 0.05472700  |
| C | -3.68196500 | -1.32092000 | -0.70753100 |
| C | -2.31024800 | -1.57643300 | -0.93427800 |
| C | -1.10008700 | -1.54968600 | -0.95377200 |
| H | -0.93041900 | 3.49683300  | 0.10330800  |
| H | -0.57435400 | 2.88223000  | -2.08785900 |
| H | 0.24322200  | 0.65598500  | -2.62680700 |
| H | -0.50163900 | 2.10102100  | 1.99178100  |
| H | 0.82764400  | -1.74372300 | -1.74758900 |
| H | 1.14550800  | -3.34834500 | 0.05954700  |
| H | 1.06306700  | -2.58882900 | 2.38511300  |
| H | 0.58636500  | -0.25903300 | 2.91207300  |
| H | -0.87834600 | -0.67202700 | 2.03395500  |
| H | -5.08988300 | -0.04868100 | 0.25412100  |
| H | -4.43927500 | -1.97219300 | -1.13010300 |
| H | 2.19583800  | 1.58708100  | 0.74975400  |
| S | 2.61837000  | 0.23622300  | -1.06431800 |
| C | 3.64211000  | -0.91392900 | -0.06805600 |
| H | 3.44906400  | -1.95517200 | -0.31954100 |
| H | 4.67018300  | -0.66487000 | -0.34131500 |
| H | 3.49638800  | -0.74700200 | 0.99719200  |

**ENTRY: S**

**MOLECULE: 28**

|                         |                   |
|-------------------------|-------------------|
| <b>DFT Theory Level</b> | B3LYP/6-31G+(d,p) |
| <b>Energy (Hartree)</b> | -709.247931       |



Cartesian coordinates of optimized enediyne **28** at B3LYP/6-31G+(d,p) level of theory, in gas phase.

```

N      1.13582600 -2.38558300  0.08362500
C      0.87422400 -2.05389600  1.42451000
C      0.83368700 -0.78604400  1.86243600
C      1.11160300  0.39597200  0.97155900
C      1.40579300 -0.02662900 -0.50849500
C      0.70496900 -1.37759700 -0.90607800
C      0.10937700  1.58698400  1.17310500
C      0.49692100  2.72560600  0.24215500
C      0.97618600  2.47342900 -0.97967600
C      1.09768000  1.08124600 -1.54125500
O      2.81538000 -0.28573400 -0.61748900
C     -0.75506700 -1.29408300 -1.01869200
C     -1.97126900 -1.22497100 -1.01397500
C     -3.31030900 -0.83932200 -0.74499500
C     -3.53571700  0.20297200  0.10917800
C     -2.42862200  0.87903300  0.68044100
C     -1.29615100  1.22214900  0.96983300
H      0.85864400 -3.32623900 -0.16822100
H      0.74764200 -2.89708300  2.09668000
H      0.66199100 -0.60133600  2.91868600
H      1.13643100 -1.66392000 -1.87222000
H      0.23911600  1.91657600  2.21310600
H      0.36004200  3.74403000  0.59576200
H      1.24378200  3.29887000 -1.63574400
H      1.88374400  1.03918300 -2.30114500
H      0.15317200  0.83961000 -2.04964600
H     -4.14190400 -1.36364700 -1.20592700
H     -4.55191000  0.51103000  0.33836900
H      2.98675500 -1.13629200 -0.18053600
H      2.06883100  0.83508200  1.28505800

```

|                         |                     |
|-------------------------|---------------------|
| <b>DFT Theory Level</b> | B3LYP/6-311G++(d,p) |
| <b>Energy (Hartree)</b> | -709.393338         |



Cartesian coordinates of optimized enediyne **28** at B3LYP/6-311G++(d,p) level of theory, in gas phase.

|   |             |             |             |
|---|-------------|-------------|-------------|
| N | 1.14822100  | -2.37830300 | 0.08379100  |
| C | 0.88455900  | -2.04727400 | 1.42267300  |
| C | 0.83517100  | -0.78435900 | 1.85976300  |
| C | 1.10543100  | 0.39865800  | 0.97063800  |
| C | 1.40059000  | -0.01871200 | -0.50941000 |
| C | 0.71205300  | -1.37470800 | -0.90684800 |
| C | 0.09905100  | 1.58433900  | 1.17391400  |
| C | 0.47806000  | 2.72352300  | 0.24262600  |
| C | 0.95176600  | 2.47523700  | -0.97651400 |
| C | 1.07743700  | 1.08567800  | -1.53843100 |
| O | 2.81182500  | -0.26343800 | -0.62241500 |
| C | -0.74476300 | -1.30239400 | -1.02144700 |
| C | -1.95282200 | -1.22658500 | -1.00942900 |
| C | -3.29142500 | -0.85124700 | -0.74412900 |
| C | -3.52311300 | 0.18500200  | 0.10792800  |
| C | -2.42169000 | 0.86236700  | 0.67912400  |
| C | -1.30153100 | 1.21355900  | 0.97488600  |
| H | 0.87802000  | -3.31946800 | -0.16627400 |
| H | 0.76391500  | -2.88956300 | 2.09415900  |
| H | 0.66341000  | -0.60172200 | 2.91436000  |
| H | 1.14597700  | -1.65671300 | -1.87085500 |
| H | 0.22899300  | 1.91464100  | 2.21151500  |
| H | 0.33835800  | 3.73928500  | 0.59675200  |
| H | 1.21277100  | 3.30083400  | -1.63186500 |
| H | 1.85584300  | 1.04844000  | -2.30350600 |
| H | 0.13215500  | 0.83814200  | -2.03825700 |
| H | -4.11713800 | -1.37979000 | -1.20651400 |
| H | -4.53908000 | 0.48803200  | 0.33606800  |
| H | 2.99270800  | -1.10490200 | -0.17966500 |
| H | 2.05928000  | 0.83991300  | 1.28478400  |

**ENTRY: T**

**MOLECULE: 29**

|                         |                   |
|-------------------------|-------------------|
| <b>DFT Theory Level</b> | B3LYP/6-31G+(d,p) |
| <b>Energy (Hartree)</b> | -1179.609428      |



Cartesian coordinates of optimized enediyne **29** at B3LYP/6-31G+(d,p) level of theory, in gas phase.

|    |             |             |             |
|----|-------------|-------------|-------------|
| Si | -2.11920800 | -0.09345600 | 0.69713700  |
| C  | -1.46428500 | 1.41919100  | 1.61396200  |
| C  | -2.63095200 | -1.43260800 | 1.92180100  |
| C  | -3.60061400 | 0.38257800  | -0.43360500 |
| C  | -4.76137100 | 0.93330100  | 0.42506000  |
| C  | -3.16913900 | 1.46353700  | -1.44827800 |
| C  | -4.09468000 | -0.85797900 | -1.21033500 |
| O  | -1.00057300 | -0.75949800 | -0.39551000 |
| C  | 0.38551700  | -0.69724500 | -0.60629300 |
| C  | 0.85126800  | 0.67841300  | -0.86929800 |
| C  | 1.34809600  | 1.78437500  | -0.97794300 |
| C  | 2.10974700  | 2.98145400  | -0.91118400 |
| C  | 3.24101000  | 3.01234300  | -0.15056300 |
| C  | 3.62553600  | 1.84405900  | 0.55953900  |
| C  | 3.69120700  | 0.72502800  | 1.03251700  |
| C  | 3.59434000  | -0.66895500 | 1.45784800  |
| C  | 2.66878400  | -1.51404900 | 0.52497700  |
| C  | 3.12761700  | -1.58463400 | -0.93844200 |
| C  | 2.08515500  | -2.34405000 | -1.76976500 |
| C  | 0.70613600  | -1.64505800 | -1.81081100 |
| C  | 1.19063800  | -1.12080200 | 0.67460400  |
| O  | 0.64322800  | -1.15097200 | 1.75834900  |
| H  | -2.24763100 | 1.81809700  | 2.26997200  |
| H  | -0.60882500 | 1.15101900  | 2.24034800  |
| H  | -1.15271800 | 2.21905400  | 0.93605700  |
| H  | -3.45372000 | -1.09136300 | 2.56100300  |
| H  | -2.96024600 | -2.34136000 | 1.40632600  |
| H  | -1.78393100 | -1.69438900 | 2.56187600  |

|   |             |             |             |
|---|-------------|-------------|-------------|
| H | -5.61093700 | 1.20940200  | -0.21582700 |
| H | -5.12771700 | 0.19364200  | 1.14653500  |
| H | -4.47125900 | 1.83162800  | 0.98255800  |
| H | -2.85005100 | 2.38847900  | -0.95408900 |
| H | -2.34342200 | 1.11941000  | -2.08038600 |
| H | -4.00901500 | 1.72108400  | -2.10994000 |
| H | -4.92782700 | -0.58420300 | -1.87392700 |
| H | -3.30061200 | -1.28579300 | -1.83148700 |
| H | -4.45813100 | -1.64506400 | -0.53954700 |
| H | 1.79037800  | 3.86167300  | -1.46139100 |
| H | 3.83812400  | 3.91761400  | -0.09222300 |
| H | 4.58707400  | -1.13640400 | 1.47700500  |
| H | 3.19612200  | -0.72445700 | 2.47811100  |
| H | 2.69656500  | -2.53397200 | 0.93729500  |
| H | 3.28141600  | -0.57839400 | -1.34059900 |
| H | 4.09578200  | -2.09755300 | -0.98631000 |
| H | 2.44912500  | -2.48767600 | -2.79251600 |
| H | 1.97096000  | -3.34959100 | -1.34292800 |
| H | -0.09506700 | -2.38875500 | -1.81687700 |
| H | 0.59916200  | -1.05338900 | -2.72441200 |

|                         |                     |
|-------------------------|---------------------|
| <b>DFT Theory Level</b> | B3LYP/6-311G++(d,p) |
| <b>Energy (Hartree)</b> | -1179.815125        |



Cartesian coordinates of optimized enediyne **29** at B3LYP/6-311G++(d,p) level of theory, in gas phase.

|    |             |             |             |
|----|-------------|-------------|-------------|
| Si | -2.12655500 | -0.09519600 | 0.70022800  |
| C  | -1.47687200 | 1.40612800  | 1.63012400  |
| C  | -2.63623400 | -1.44557400 | 1.90583000  |
| C  | -3.59912300 | 0.38549000  | -0.43540400 |
| C  | -4.77242400 | 0.91300900  | 0.41809500  |
| C  | -3.16511400 | 1.48443800  | -1.42729900 |
| C  | -4.07334300 | -0.84626200 | -1.23533900 |

|   |             |             |             |
|---|-------------|-------------|-------------|
| O | -0.99760100 | -0.74322900 | -0.38773000 |
| C | 0.38698900  | -0.68883100 | -0.60304600 |
| C | 0.85707600  | 0.68066100  | -0.86823100 |
| C | 1.35463800  | 1.77873600  | -0.97349800 |
| C | 2.11572100  | 2.97172400  | -0.90385700 |
| C | 3.24170100  | 2.99943000  | -0.14384600 |
| C | 3.62241300  | 1.83224700  | 0.56282500  |
| C | 3.69255300  | 0.72061900  | 1.03314700  |
| C | 3.59609000  | -0.67118700 | 1.45269100  |
| C | 2.66921300  | -1.51075600 | 0.51910500  |
| C | 3.12396100  | -1.57209500 | -0.94426100 |
| C | 2.08321900  | -2.32848700 | -1.77742400 |
| C | 0.70018600  | -1.63960000 | -1.80485500 |
| C | 1.19191100  | -1.11889500 | 0.67659800  |
| O | 0.64886900  | -1.15668800 | 1.75406800  |
| H | -2.26496100 | 1.81403600  | 2.27169100  |
| H | -0.63746800 | 1.12815200  | 2.27075900  |
| H | -1.14406900 | 2.20124000  | 0.95979700  |
| H | -3.45730800 | -1.11385500 | 2.54915200  |
| H | -2.96445800 | -2.34727700 | 1.38140900  |
| H | -1.79067700 | -1.71366800 | 2.54224800  |
| H | -5.61429400 | 1.19380500  | -0.22753600 |
| H | -5.14127200 | 0.15950400  | 1.12084500  |
| H | -4.49586200 | 1.80182500  | 0.99383200  |
| H | -2.86437600 | 2.40378500  | -0.91566200 |
| H | -2.32751500 | 1.15905100  | -2.05044000 |
| H | -3.99684600 | 1.74105300  | -2.09629000 |
| H | -4.89679200 | -0.56826500 | -1.90601400 |
| H | -3.26833500 | -1.25980400 | -1.84857500 |
| H | -4.44119700 | -1.64317100 | -0.58176200 |
| H | 1.79886300  | 3.85169900  | -1.45231000 |
| H | 3.83911500  | 3.90210200  | -0.08208500 |
| H | 4.58743600  | -1.13728300 | 1.46925400  |
| H | 3.20072400  | -0.72958000 | 2.47190200  |
| H | 2.69652600  | -2.53184800 | 0.92363600  |
| H | 3.27491100  | -0.56513400 | -1.34011900 |
| H | 4.09130500  | -2.08176600 | -0.99780700 |
| H | 2.44287700  | -2.45941600 | -2.80115500 |
| H | 1.97721600  | -3.33712100 | -1.36114400 |
| H | -0.09472500 | -2.38686900 | -1.79774300 |
| H | 0.57744000  | -1.05389400 | -2.71790400 |

**ENTRY: U**  
**MOLECULE: 30**

|                  |                   |
|------------------|-------------------|
| DFT Theory Level | B3LYP/6-31G+(d,p) |
|------------------|-------------------|

|                  |              |
|------------------|--------------|
| Energy (Hartree) | -1140.296648 |
|------------------|--------------|



Cartesian coordinates of optimized enediyne **30** at B3LYP/6-31G+(d,p) level of theory, in gas phase.

|    |             |             |             |
|----|-------------|-------------|-------------|
| Si | 2.10341800  | -0.16117300 | -0.62376900 |
| C  | 1.50715600  | 1.17420200  | -1.81299500 |
| C  | 2.50903000  | -1.73928100 | -1.57278700 |
| C  | 3.61093100  | 0.43199400  | 0.40662300  |
| C  | 4.81310100  | 0.70555200  | -0.52484900 |
| C  | 3.25289500  | 1.73060600  | 1.16194600  |
| C  | 4.00495400  | -0.65162300 | 1.43448400  |
| O  | 0.95096100  | -0.52522200 | 0.57467300  |
| C  | -0.43962200 | -0.42792800 | 0.67160800  |
| C  | -0.98430700 | 0.93691400  | 0.56219300  |
| C  | -1.68957600 | 1.91877100  | 0.41153900  |
| C  | -2.69227300 | 2.88512600  | 0.13686500  |
| C  | -3.91514500 | 2.46859300  | -0.29982600 |
| C  | -4.15192700 | 1.08028300  | -0.48606400 |
| C  | -4.08412300 | -0.13185000 | -0.56872100 |
| C  | -3.77792600 | -1.56202000 | -0.58492400 |
| C  | -2.46812300 | -1.87906300 | 0.19496500  |
| C  | -2.42868500 | -1.46512100 | 1.68199700  |
| C  | -0.95351900 | -1.11271100 | 1.96402800  |
| C  | -1.22125900 | -1.23669500 | -0.42778900 |
| O  | -0.85218700 | -1.37234800 | -1.57240900 |
| H  | 2.29812100  | 1.40756900  | -2.53611800 |
| H  | 0.63480300  | 0.82386500  | -2.37270300 |
| H  | 1.23392900  | 2.10110700  | -1.30007100 |
| H  | 3.32840000  | -1.57541200 | -2.28254000 |
| H  | 2.80552200  | -2.55021500 | -0.89865200 |
| H  | 1.63186800  | -2.06914100 | -2.13747500 |
| H  | 5.67468500  | 1.05679300  | 0.06065900  |

|   |             |             |             |
|---|-------------|-------------|-------------|
| H | 5.13246500  | -0.19516100 | -1.06167200 |
| H | 4.59100300  | 1.47980600  | -1.26877600 |
| H | 3.01225000  | 2.55109000  | 0.47601600  |
| H | 2.39522600  | 1.58731400  | 1.82792200  |
| H | 4.10237500  | 2.05901700  | 1.77789900  |
| H | 4.85695100  | -0.30996100 | 2.04000700  |
| H | 3.17885300  | -0.87677000 | 2.11694500  |
| H | 4.30586600  | -1.58794000 | 0.94990200  |
| H | -2.48661400 | 3.94211200  | 0.27783300  |
| H | -4.69907600 | 3.19223000  | -0.50329500 |
| H | -4.60295600 | -2.14140500 | -0.15123000 |
| H | -3.65723400 | -1.90722800 | -1.61954700 |
| H | -2.30241300 | -2.96218900 | 0.10418200  |
| H | -3.06210300 | -0.58734500 | 1.84214700  |
| H | -2.79097500 | -2.25937600 | 2.34112100  |
| H | -0.34874700 | -2.01742100 | 2.09860600  |
| H | -0.81973300 | -0.47885200 | 2.84372900  |

|                         |                     |
|-------------------------|---------------------|
| <b>DFT Theory Level</b> | B3LYP/6-311G++(d,p) |
| <b>Energy (Hartree)</b> | -1140.495397        |



Cartesian coordinates of optimized enediyne **30** at B3LYP/6-311G++(d,p) level of theory, in gas phase.

|    |             |             |             |
|----|-------------|-------------|-------------|
| Si | 2.10964300  | -0.16926800 | -0.62536600 |
| C  | 1.51957500  | 1.14470000  | -1.83452100 |
| C  | 2.52149300  | -1.75786900 | -1.54464500 |
| C  | 3.60537200  | 0.43857500  | 0.40926500  |
| C  | 4.81800200  | 0.69004900  | -0.51238100 |
| C  | 3.24229300  | 1.75104500  | 1.13458800  |
| C  | 3.98306200  | -0.62595200 | 1.46072800  |
| O  | 0.94546000  | -0.51600100 | 0.56167300  |
| C  | -0.44353800 | -0.42184400 | 0.66546300  |
| C  | -0.99011000 | 0.93738900  | 0.55440500  |
| C  | -1.68593600 | 1.91662700  | 0.40160400  |
| C  | -2.68589100 | 2.87998500  | 0.12463200  |
| C  | -3.90595200 | 2.46381500  | -0.30550000 |
| C  | -4.14484200 | 1.07848000  | -0.48365800 |
| C  | -4.08335100 | -0.12674300 | -0.56160800 |

|   |             |             |             |
|---|-------------|-------------|-------------|
| C | -3.78261400 | -1.55412800 | -0.57388600 |
| C | -2.47202600 | -1.87211300 | 0.20052900  |
| C | -2.42639400 | -1.45418100 | 1.68448800  |
| C | -0.95148500 | -1.10316800 | 1.95997200  |
| C | -1.22602700 | -1.23730300 | -0.42991300 |
| O | -0.85755400 | -1.38292300 | -1.56546700 |
| H | 2.31615900  | 1.38194100  | -2.54732200 |
| H | 0.66180700  | 0.77846700  | -2.40312100 |
| H | 1.22685400  | 2.07091900  | -1.33528100 |
| H | 3.33757300  | -1.60297500 | -2.25738100 |
| H | 2.82194000  | -2.55504700 | -0.85901700 |
| H | 1.64752600  | -2.10112800 | -2.10299100 |
| H | 5.67183700  | 1.04971100  | 0.07575000  |
| H | 5.13992400  | -0.22087600 | -1.02610800 |
| H | 4.60769900  | 1.44841100  | -1.27318000 |
| H | 3.01600700  | 2.55817800  | 0.43118500  |
| H | 2.37539500  | 1.62368300  | 1.78872900  |
| H | 4.08269900  | 2.08583600  | 1.75606100  |
| H | 4.82675100  | -0.27523900 | 2.06918200  |
| H | 3.14886900  | -0.83638100 | 2.13489400  |
| H | 4.28689800  | -1.56991600 | 0.99760600  |
| H | -2.47909600 | 3.93567700  | 0.25907100  |
| H | -4.68832200 | 3.18573600  | -0.51127400 |
| H | -4.60716500 | -2.12755500 | -0.13603300 |
| H | -3.66864700 | -1.90249200 | -1.60627300 |
| H | -2.30776500 | -2.95371200 | 0.11380100  |
| H | -3.05664700 | -0.57675100 | 1.84472900  |
| H | -2.78647400 | -2.24460700 | 2.34584900  |
| H | -0.34786400 | -2.00634000 | 2.09337900  |
| H | -0.81400300 | -0.46858100 | 2.83584800  |

**ENTRY: V**

**MOLECULE: 31**

|                         |                   |
|-------------------------|-------------------|
| <b>DFT Theory Level</b> | B3LYP/6-31G+(d,p) |
| <b>Energy (Hartree)</b> | -1438.847824      |



Cartesian coordinates of optimized enediyne **31** at B3LYP/6-31G+(d,p) level of theory, in gas phase.

|   |             |             |             |
|---|-------------|-------------|-------------|
| C | -3.32395100 | -3.00167400 | -2.33401800 |
| C | -4.50771800 | -2.99167700 | -1.65708300 |
| C | -2.16906900 | -2.46053800 | -1.71025800 |
| C | -4.55749800 | -2.44631400 | -0.34748700 |
| C | -4.32471100 | -1.93486400 | 0.73150500  |
| C | -3.82418900 | -1.30304800 | 1.94993300  |
| C | -2.48900500 | -0.52171500 | 1.70277700  |
| C | -1.34699900 | -1.94100200 | -0.97921100 |
| C | -1.55405900 | 2.00757800  | -1.01985900 |
| C | -2.69932100 | 2.78333000  | -1.09165300 |
| C | -3.80288100 | 2.47852300  | -0.28144700 |
| C | -3.73762500 | 1.39369700  | 0.59394800  |
| C | -2.57397400 | 0.61029500  | 0.68631900  |
| C | -1.47555500 | 0.92797300  | -0.12526700 |
| N | -0.31231100 | 0.09559300  | -0.06797300 |
| C | -0.56357300 | -1.34421000 | 0.10705600  |
| C | -1.36268700 | -1.52841300 | 1.42106800  |
| C | 0.96869900  | 0.63160000  | -0.08774100 |
| O | -1.09046500 | -2.41326100 | 2.20501000  |
| O | 1.90085800  | -0.34538500 | -0.03542600 |
| O | 1.19874400  | 1.82777500  | -0.14879900 |
| C | 5.28010600  | 0.97534300  | 1.19231700  |
| C | 5.72005800  | 1.67909600  | -0.10982600 |
| C | 5.31005000  | 0.82164500  | -1.32694400 |
| C | 3.77214700  | 0.65294300  | -1.33790400 |
| C | 3.34071100  | -0.03812500 | -0.03289900 |
| C | 3.74213000  | 0.80586400  | 1.18874400  |
| C | 5.98507500  | -0.56215500 | -1.23251400 |
| C | 4.00276800  | -1.42265300 | 0.05983100  |
| C | 5.53850700  | -1.26253000 | 0.06827600  |
| C | 5.95610000  | -0.40831900 | 1.28403200  |

|   |             |             |             |
|---|-------------|-------------|-------------|
| O | -4.89169700 | 3.29379500  | -0.42500900 |
| C | -6.04647700 | 3.03496500  | 0.36232600  |
| H | -3.26375800 | -3.42171800 | -3.33352100 |
| H | -5.40315300 | -3.40193900 | -2.11523000 |
| H | -4.57107600 | -0.63120300 | 2.38590700  |
| H | -3.61428100 | -2.06718400 | 2.70773700  |
| H | -2.21705300 | -0.08923200 | 2.67740700  |
| H | -0.70247000 | 2.24257200  | -1.64457100 |
| H | -2.76418700 | 3.62314700  | -1.77521400 |
| H | -4.59012100 | 1.14823300  | 1.21323600  |
| H | 0.39031300  | -1.85181400 | 0.23513200  |
| H | 5.56584500  | 1.58643700  | 2.05751000  |
| H | 6.80781700  | 1.82867000  | -0.10604500 |
| H | 5.25897800  | 2.67294300  | -0.17603800 |
| H | 5.61760600  | 1.32280700  | -2.25314900 |
| H | 3.28111300  | 1.62529200  | -1.42489500 |
| H | 3.45989900  | 0.03870000  | -2.19223200 |
| H | 3.41069200  | 0.29823900  | 2.10390800  |
| H | 3.24904300  | 1.77997100  | 1.14783200  |
| H | 7.07739700  | -0.45173500 | -1.24418500 |
| H | 5.71569100  | -1.17455500 | -2.10344700 |
| H | 3.66194800  | -1.92673100 | 0.97247300  |
| H | 3.68271600  | -2.03507300 | -0.79211700 |
| H | 6.00080000  | -2.25536300 | 0.13398600  |
| H | 5.66584500  | -0.91028600 | 2.21656200  |
| H | 7.04789700  | -0.29489700 | 1.30689900  |
| H | -6.77493100 | 3.79636700  | 0.08093700  |
| H | -5.82783100 | 3.12149100  | 1.43455200  |
| H | -6.46044400 | 2.04063300  | 0.15203800  |

|                         |                     |
|-------------------------|---------------------|
| <b>DFT Theory Level</b> | B3LYP/6-311G++(d,p) |
| <b>Energy (Hartree)</b> | -1439.144465        |



Cartesian coordinates of optimized enediyne **31** at B3LYP/6-311G++(d,p) level of theory, in gas phase.

|   |             |             |             |
|---|-------------|-------------|-------------|
| C | -3.33774700 | -2.97730800 | -2.32858000 |
| C | -4.51234000 | -2.96795300 | -1.64534000 |
| C | -2.17985800 | -2.44310300 | -1.71244200 |
| C | -4.55199300 | -2.43000000 | -0.33625400 |
| C | -4.31752200 | -1.92760200 | 0.73814400  |
| C | -3.80833100 | -1.30335100 | 1.95237200  |
| C | -2.47475700 | -0.52579800 | 1.69695900  |
| C | -1.35539100 | -1.93255500 | -0.99000700 |
| C | -1.55992500 | 2.00446400  | -1.02101200 |
| C | -2.70425300 | 2.77544700  | -1.08700600 |
| C | -3.80174300 | 2.46913500  | -0.27441300 |
| C | -3.72993500 | 1.38636700  | 0.59748000  |
| C | -2.56640100 | 0.60734400  | 0.68426800  |
| C | -1.47483100 | 0.92658500  | -0.12981500 |
| N | -0.31171500 | 0.09544600  | -0.07962700 |
| C | -0.56312500 | -1.34417000 | 0.08902800  |
| C | -1.35300100 | -1.53615800 | 1.40762500  |
| C | 0.96814800  | 0.63345700  | -0.09584100 |
| O | -1.08152000 | -2.41966500 | 2.18158700  |
| O | 1.89795300  | -0.34260700 | -0.03903100 |
| O | 1.19677600  | 1.82212600  | -0.15576900 |
| C | 5.27460200  | 0.97526000  | 1.19299800  |
| C | 5.71756100  | 1.67643400  | -0.10736800 |
| C | 5.31018800  | 0.81840600  | -1.32270600 |
| C | 3.77383400  | 0.65127900  | -1.33733600 |
| C | 3.33894400  | -0.03680900 | -0.03386300 |
| C | 3.73820800  | 0.80713300  | 1.18651100  |
| C | 5.98295000  | -0.56422600 | -1.22519300 |
| C | 3.99878200  | -1.42012100 | 0.06208800  |
| C | 5.53298100  | -1.26158200 | 0.07400200  |
| C | 5.94838000  | -0.40726100 | 1.28820700  |
| O | -4.89161800 | 3.28028300  | -0.41271800 |
| C | -6.04136100 | 3.01812600  | 0.37892800  |
| H | -3.28553900 | -3.39232800 | -3.32862800 |
| H | -5.41060400 | -3.37378800 | -2.09755800 |
| H | -4.54964200 | -0.63292800 | 2.39520000  |
| H | -3.59617500 | -2.07011200 | 2.70416600  |
| H | -2.19259300 | -0.09394100 | 2.66679500  |
| H | -0.71388300 | 2.24099200  | -1.64954000 |
| H | -2.77432000 | 3.61388400  | -1.76890800 |
| H | -4.57805700 | 1.13903900  | 1.21900400  |
| H | 0.38925400  | -1.85305500 | 0.20572900  |
| H | 5.55836300  | 1.58591000  | 2.05624700  |
| H | 6.80329900  | 1.82552100  | -0.10132400 |
| H | 5.25803600  | 2.66852100  | -0.17587000 |
| H | 5.61974400  | 1.31699600  | -2.24690700 |
| H | 3.28526500  | 1.62235300  | -1.42723100 |

|   |             |             |             |
|---|-------------|-------------|-------------|
| H | 3.46395000  | 0.03730900  | -2.19013200 |
| H | 3.40543000  | 0.30152800  | 2.09989200  |
| H | 3.24691800  | 1.77984100  | 1.14426600  |
| H | 7.07336700  | -0.45518000 | -1.23470400 |
| H | 5.71554300  | -1.17629000 | -2.09428400 |
| H | 3.65560900  | -1.92143400 | 0.97285100  |
| H | 3.68071500  | -2.03196100 | -0.78833000 |
| H | 5.99322600  | -2.25267800 | 0.14193600  |
| H | 5.65604300  | -0.90663200 | 2.21896700  |
| H | 7.03819100  | -0.29516700 | 1.31358000  |
| H | -6.77235900 | 3.77600200  | 0.10194600  |
| H | -5.81940800 | 3.10509000  | 1.44854400  |
| H | -6.45349100 | 2.02466400  | 0.17052700  |

**ENTRY: W**  
**MOLECULE: 32**

|                         |                   |
|-------------------------|-------------------|
| <b>DFT Theory Level</b> | B3LYP/6-31G+(d,p) |
| <b>Energy (Hartree)</b> | -860.718146       |



Cartesian coordinates of optimized enediyne **32** at B3LYP/6-31G+(d,p) level of theory, in gas phase.

|   |             |             |             |
|---|-------------|-------------|-------------|
| C | -3.32395100 | -3.00167400 | -2.33401800 |
| C | -4.50771800 | -2.99167700 | -1.65708300 |
| C | -2.16906900 | -2.46053800 | -1.71025800 |
| C | -4.55749800 | -2.44631400 | -0.34748700 |
| C | -4.32471100 | -1.93486400 | 0.73150500  |
| C | -3.82418900 | -1.30304800 | 1.94993300  |
| C | -2.48900500 | -0.52171500 | 1.70277700  |
| C | -1.34699900 | -1.94100200 | -0.97921100 |
| C | -1.55405900 | 2.00757800  | -1.01985900 |
| C | -2.69932100 | 2.78333000  | -1.09165300 |
| C | -3.80288100 | 2.47852300  | -0.28144700 |
| C | -3.73762500 | 1.39369700  | 0.59394800  |

|   |             |             |             |
|---|-------------|-------------|-------------|
| C | -2.57397400 | 0.61029500  | 0.68631900  |
| C | -1.47555500 | 0.92797300  | -0.12526700 |
| N | -0.31231100 | 0.09559300  | -0.06797300 |
| C | -0.56357300 | -1.34421000 | 0.10705600  |
| C | -1.36268700 | -1.52841300 | 1.42106800  |
| O | -1.09046500 | -2.41326100 | 2.20501000  |
| O | -4.89169700 | 3.29379500  | -0.42500900 |
| C | -6.04647700 | 3.03496500  | 0.36232600  |
| H | -3.26375800 | -3.42171800 | -3.33352100 |
| H | -5.40315300 | -3.40193900 | -2.11523000 |
| H | -4.57107600 | -0.63120300 | 2.38590700  |
| H | -3.61428100 | -2.06718400 | 2.70773700  |
| H | -2.21705300 | -0.08923200 | 2.67740700  |
| H | -0.70247000 | 2.24257200  | -1.64457100 |
| H | -2.76418700 | 3.62314700  | -1.77521400 |
| H | -4.59012100 | 1.14823300  | 1.21323600  |
| H | 0.39031300  | -1.85181400 | 0.23513200  |
| H | -6.77493100 | 3.79636700  | 0.08093700  |
| H | -5.82783100 | 3.12149100  | 1.43455200  |
| H | -6.46044400 | 2.04063300  | 0.15203800  |
| H | 0.61251678  | 0.46867342  | -0.14216578 |

|                         |                     |
|-------------------------|---------------------|
| <b>DFT Theory Level</b> | B3LYP/6-311G++(d,p) |
| <b>Energy (Hartree)</b> | -860.896923         |



Cartesian coordinates of optimized enediyne **32** at B3LYP/6-311G++(d,p) level of theory, in gas phase.

|   |             |             |             |
|---|-------------|-------------|-------------|
| C | -2.62515400 | 1.79959400  | -2.02031600 |
| C | -2.14856500 | 2.77186700  | -1.19874700 |
| C | -2.51334700 | 0.44637600  | -1.61864400 |
| C | -1.56200000 | 2.41193900  | 0.03823300  |
| C | -1.12599300 | 1.84527000  | 1.01324800  |
| C | -0.67392400 | 0.97259900  | 2.08838600  |
| C | -0.41955300 | -0.49059000 | 1.59494300  |
| C | -2.30529000 | -0.60407300 | -1.05483900 |
| C | 1.53783300  | -1.77971500 | -1.41415100 |

|   |             |             |             |
|---|-------------|-------------|-------------|
| C | 2.70786000  | -1.04577900 | -1.33756000 |
| C | 2.86211600  | -0.08392200 | -0.33379900 |
| C | 1.83555100  | 0.11383100  | 0.58617400  |
| C | 0.65098500  | -0.63440700 | 0.52315900  |
| C | 0.50131800  | -1.58898400 | -0.48953400 |
| N | -0.66246200 | -2.38589500 | -0.54265400 |
| C | -1.92191500 | -1.72386400 | -0.18641900 |
| C | -1.76299100 | -1.15287200 | 1.24426100  |
| O | -2.65431700 | -1.23144700 | 2.05179600  |
| O | 4.04570900  | 0.60563100  | -0.34159700 |
| C | 4.24914400  | 1.61120600  | 0.63834900  |
| H | -3.08748200 | 2.05561400  | -2.96673900 |
| H | -2.22321400 | 3.81477200  | -1.48656100 |
| H | 0.23257700  | 1.36312300  | 2.55874400  |
| H | -1.43531200 | 0.92488200  | 2.87348600  |
| H | -0.08911700 | -1.04702200 | 2.48304400  |
| H | 1.41917700  | -2.51651100 | -2.20247500 |
| H | 3.50854500  | -1.19230700 | -2.05210500 |
| H | 1.94846900  | 0.85224000  | 1.36754300  |
| H | -2.71157600 | -2.47591500 | -0.13979600 |
| H | 5.23265200  | 2.03207800  | 0.43486300  |
| H | 4.23958800  | 1.19308400  | 1.65171500  |
| H | 3.49482900  | 2.40271700  | 0.56382500  |
| H | -0.73947300 | -2.90983500 | -1.40502100 |

**ENTRY: X**

**MOLECULE: 33**

|                         |                   |
|-------------------------|-------------------|
| <b>DFT Theory Level</b> | B3LYP/6-31G+(d,p) |
| <b>Energy (Hartree)</b> | -1495.164652      |



Cartesian coordinates of optimized enediyne **33** at B3LYP/6-31G+(d,p) level of theory, in gas phase.

|   |             |             |             |
|---|-------------|-------------|-------------|
| C | 3.10146400  | -1.92239300 | 3.48609800  |
| C | 4.32900400  | -2.09730300 | 2.91748700  |
| C | 1.99945900  | -1.61890100 | 2.64374900  |
| C | 4.46161700  | -1.96779800 | 1.51030500  |
| C | 4.25764200  | -1.79937500 | 0.32289200  |
| C | 3.86286300  | -1.57677500 | -1.06299500 |
| C | 2.50245000  | -0.80054100 | -1.22494100 |
| C | 1.27307900  | -1.37075000 | 1.70088800  |
| C | 1.43486900  | 2.44090300  | 0.54526300  |
| C | 2.55538000  | 3.23539800  | 0.37401900  |
| C | 3.67647400  | 2.72542100  | -0.29738000 |
| C | 3.65329400  | 1.41838300  | -0.78398300 |
| C | 2.51714200  | 0.60484700  | -0.62316300 |
| C | 1.39811500  | 1.13158500  | 0.03738700  |
| N | 0.24973000  | 0.30207100  | 0.23742600  |
| C | 0.53162200  | -1.12845600 | 0.45729100  |
| C | 1.30781900  | -1.62279800 | -0.76381700 |
| C | -1.03698600 | 0.78286700  | 0.03609900  |
| O | -1.95506100 | -0.18558200 | 0.26144100  |
| O | -1.28766200 | 1.93121800  | -0.28739100 |
| C | -5.32294900 | 0.58552000  | -1.38941600 |
| C | -5.80154200 | 1.67448900  | -0.40472200 |
| C | -5.40815800 | 1.28083800  | 1.03545600  |
| C | -3.86864200 | 1.15573400  | 1.12913800  |
| C | -3.39876600 | 0.07821400  | 0.13656600  |
| C | -3.78301300 | 0.45909900  | -1.30303000 |
| C | -6.06319800 | -0.06767800 | 1.39872100  |
| C | -4.04127300 | -1.27030300 | 0.50179900  |
| C | -5.57825900 | -1.15317700 | 0.41457600  |
| C | -5.97783400 | -0.76295200 | -1.02371500 |
| O | 4.73814100  | 3.57865200  | -0.41668700 |
| C | 5.91096000  | 3.12260700  | -1.07817500 |
| H | 2.96922400  | -2.01587000 | 4.55952300  |
| H | 5.19130300  | -2.33283500 | 3.53437800  |
| H | 4.64327400  | -1.02969500 | -1.60290000 |
| H | 3.76905500  | -2.53741500 | -1.58184600 |
| H | 2.38907900  | -0.68691200 | -2.31264300 |
| H | 0.56798700  | 2.83309900  | 1.06052900  |
| H | 2.58733900  | 4.24925500  | 0.75833400  |
| H | 4.51949900  | 1.02050300  | -1.29588400 |
| H | -0.42674500 | -1.64361600 | 0.49510500  |
| H | -5.59747600 | 0.86636400  | -2.41368600 |
| H | -6.89062400 | 1.79323100  | -0.47688200 |
| H | -5.35391300 | 2.64186500  | -0.66613900 |
| H | -5.74236600 | 2.05667300  | 1.73538100  |
| H | -3.39242900 | 2.11087400  | 0.89611800  |
| H | -3.56887700 | 0.86750400  | 2.14495500  |

|   |             |             |             |
|---|-------------|-------------|-------------|
| H | -3.42348100 | -0.31671100 | -1.99137700 |
| H | -3.30374200 | 1.40140300  | -1.57932900 |
| H | -7.15681900 | 0.01849200  | 1.35429100  |
| H | -5.80567100 | -0.34868600 | 2.42868200  |
| H | -3.67601800 | -2.04373900 | -0.18561400 |
| H | -3.73178700 | -1.55681100 | 1.51447000  |
| H | -6.02584300 | -2.12008500 | 0.67626200  |
| H | -5.66030100 | -1.54197500 | -1.72966400 |
| H | -7.07016500 | -0.68591400 | -1.10257700 |
| H | 6.61146100  | 3.95806100  | -1.05066100 |
| H | 5.70421100  | 2.85732500  | -2.12293900 |
| H | 6.35270700  | 2.26104600  | -0.56148100 |
| C | 0.84767000  | -2.70333100 | -1.42762000 |
| H | -0.01778900 | -3.24862400 | -1.06077800 |
| C | 1.42825200  | -3.20347800 | -2.63200500 |
| N | 1.88801600  | -3.61642800 | -3.62016400 |

|                         |                     |
|-------------------------|---------------------|
| <b>DFT Theory Level</b> | B3LYP/6-311G++(d,p) |
| <b>Energy (Hartree)</b> | -1495.468935        |



Cartesian coordinates of optimized enediyne **33** at B3LYP/6-311G++(d,p) level of theory, in gas phase.

|   |            |             |             |
|---|------------|-------------|-------------|
| C | 3.12306000 | -1.90209000 | 3.46997500  |
| C | 4.34014300 | -2.08107000 | 2.89181200  |
| C | 2.01664000 | -1.60236600 | 2.63824900  |
| C | 4.45741000 | -1.95885900 | 1.48642500  |
| C | 4.25378300 | -1.79834000 | 0.30561500  |
| C | 3.84517500 | -1.58117200 | -1.07322700 |
| C | 2.48553300 | -0.80391400 | -1.22154000 |
| C | 1.28176300 | -1.35867700 | 1.71039400  |
| C | 1.44561100 | 2.43833600  | 0.54783900  |
| C | 2.56543300 | 3.22574400  | 0.36966700  |
| C | 3.67837300 | 2.71268400  | -0.30667600 |

|   |             |             |             |
|---|-------------|-------------|-------------|
| C | 3.64655100  | 1.40854000  | -0.79065700 |
| C | 2.51030900  | 0.60144500  | -0.62249800 |
| C | 1.39997700  | 1.13166900  | 0.04242200  |
| N | 0.25063300  | 0.30730900  | 0.25050500  |
| C | 0.53096000  | -1.12184000 | 0.47576000  |
| C | 1.29549800  | -1.62374200 | -0.74795400 |
| C | -1.03442200 | 0.78999600  | 0.04521600  |
| O | -1.95042900 | -0.17831800 | 0.26659400  |
| O | -1.28268000 | 1.93081000  | -0.27788500 |
| C | -5.31508200 | 0.58552800  | -1.38988400 |
| C | -5.79752600 | 1.67244300  | -0.40762400 |
| C | -5.40701800 | 1.27978900  | 1.03166000  |
| C | -3.86911800 | 1.15819800  | 1.12896400  |
| C | -3.39511400 | 0.08293100  | 0.13851900  |
| C | -3.77670700 | 0.46232900  | -1.30042400 |
| C | -6.05915600 | -0.06853300 | 1.39339000  |
| C | -4.03485300 | -1.26534400 | 0.50190000  |
| C | -5.57014800 | -1.15161600 | 0.41133100  |
| C | -5.96715500 | -0.76288200 | -1.02614900 |
| O | 4.74142300  | 3.55984000  | -0.43216700 |
| C | 5.90775200  | 3.09854900  | -1.09916500 |
| H | 3.00098900  | -1.98979400 | 4.54323200  |
| H | 5.20742700  | -2.31462500 | 3.49921800  |
| H | 4.61919300  | -1.03784000 | -1.62227600 |
| H | 3.74565100  | -2.54230600 | -1.58614500 |
| H | 2.35894800  | -0.68907200 | -2.30568500 |
| H | 0.58573000  | 2.83405400  | 1.06837100  |
| H | 2.60439700  | 4.23784800  | 0.75291200  |
| H | 4.50661000  | 1.00764600  | -1.30684100 |
| H | -0.42634300 | -1.63371000 | 0.52501600  |
| H | -5.58742100 | 0.86514600  | -2.41261500 |
| H | -6.88456500 | 1.78938300  | -0.48226400 |
| H | -5.35189100 | 2.63876400  | -0.66750000 |
| H | -5.74374000 | 2.05330200  | 1.72934800  |
| H | -3.39556000 | 2.11283100  | 0.89788000  |
| H | -3.57198700 | 0.87122700  | 2.14373900  |
| H | -3.41511300 | -0.31145100 | -1.98675200 |
| H | -3.29975100 | 1.40378900  | -1.57584300 |
| H | -7.15084300 | 0.01503200  | 1.34715700  |
| H | -5.80351900 | -0.34838500 | 2.42187500  |
| H | -3.66685200 | -2.03621400 | -0.18358100 |
| H | -3.72746700 | -1.55031000 | 1.51337400  |
| H | -6.01541500 | -2.11740300 | 0.67148700  |
| H | -5.64704200 | -1.53965500 | -1.73009900 |
| H | -7.05743100 | -0.68849200 | -1.10749800 |
| H | 6.61156000  | 3.92888800  | -1.07586900 |
| H | 5.69546400  | 2.83471300  | -2.14126100 |
| H | 6.34816300  | 2.23672200  | -0.58566300 |
| C | 0.83176900  | -2.70331300 | -1.40132700 |
| H | -0.02961800 | -3.24562300 | -1.02619900 |

C            1.40060300 -3.20800800 -2.60426500  
 N            1.84703200 -3.62468100 -3.58712400

### 3. Comparative table on the important structural parameters of the theoretical models with the available crystal data for compound 17 and 29

#### Compound 17

| Model                                     | a-b<br>(distance<br>in Å) | c-d<br>(distance<br>in Å) | Bond angle (in degrees) |                |                |                | RMSD (in Å)<br><br>(obtained<br>using VMD<br>software) |
|-------------------------------------------|---------------------------|---------------------------|-------------------------|----------------|----------------|----------------|--------------------------------------------------------|
|                                           |                           |                           | P <sub>a</sub>          | P <sub>b</sub> | P <sub>c</sub> | P <sub>d</sub> |                                                        |
| Crystal                                   | 2.778                     | 3.661                     | 172.61                  | 169.44         | 173.15         | 170.50         | Reference                                              |
| Optimized Model<br>from 6-31G+(d,p)       | 2.834                     | 3.763                     | 171.88                  | 170.56         | 172.24         | 169.24         | 0.1288                                                 |
| Optimized Model<br>from 6-<br>311G++(d,p) | 2.829                     | 3.748                     | 171.76                  | 170.29         | 172.47         | 169.56         | 0.1243                                                 |

#### Compound 29

| Model                               | a-b<br>(distance<br>in Å) | c-d<br>(distance<br>in Å) | Bond angle (in degrees) |                |                |                | RMSD (in Å)<br><br>(obtained using<br>VMD software) |
|-------------------------------------|---------------------------|---------------------------|-------------------------|----------------|----------------|----------------|-----------------------------------------------------|
|                                     |                           |                           | P <sub>a</sub>          | P <sub>b</sub> | P <sub>c</sub> | P <sub>d</sub> |                                                     |
| Crystal                             | 2.720                     | 3.391                     | 168.66                  | 165.71         | 171.57         | 169.81         | Reference                                           |
| Optimized Model<br>from 6-31G+(d,p) | 2.748                     | 3.418                     | 168.62                  | 164.93         | 172.52         | 170.90         | 0.2033                                              |

|                                           |       |       |        |        |        |        |        |
|-------------------------------------------|-------|-------|--------|--------|--------|--------|--------|
| Optimized Model<br>from 6-<br>311G++(d,p) | 2.740 | 3.414 | 168.71 | 165.29 | 172.39 | 170.59 | 0.2117 |
|-------------------------------------------|-------|-------|--------|--------|--------|--------|--------|

**4. Comparative table on the important structural parameters and energy values for some of the borderline compounds (with respect to the average interior angle value) using B3LYP/6-311G(d,p) along with the previously used theory levels**

| Molecular Structure with ID                                                                      | Theory Level        | cd-distance (in Å) | P <sub>a</sub> (in degree) | P <sub>b</sub> (in degree) | (P <sub>a</sub> +P <sub>b</sub> )/2 (in degree) | Energy (Hartree) |
|--------------------------------------------------------------------------------------------------|---------------------|--------------------|----------------------------|----------------------------|-------------------------------------------------|------------------|
| <br><b>14</b> | B3LYP/6-311G++(d,p) | 3.383              | 165.89                     | 165.89                     | 165.89                                          | -387.045722      |
|                                                                                                  | B3LYP/6-31G+ (d,p)  | 3.376              | 165.40                     | 165.40                     | 165.40                                          | -386.969326      |
|                                                                                                  | B3LYP/6-311G(d,p)   | 3.389              | 166.00                     | 166.00                     | 166.00                                          | -387.042017      |
| <br><b>19</b> | B3LYP/6-311G++(d,p) | 3.338              | 164.72                     | 166.53                     | 165.63                                          | -1222.152364     |
|                                                                                                  | B3LYP/6-31G+ (d,p)  | 3.339              | 164.24                     | 166.38                     | 165.31                                          | -1221.957159     |
|                                                                                                  | B3LYP/6-311G(d,p)   | 3.340              | 164.68                     | 166.56                     | 165.62                                          | -1222.140738     |
| <br><b>22</b> | B3LYP/6-311G++(d,p) | 3.436              | 166.60                     | 166.43                     | 166.52                                          | -694.813768      |
|                                                                                                  | B3LYP/6-31G+ (d,p)  | 3.441              | 166.33                     | 166.25                     | 166.29                                          | -694.665975      |
|                                                                                                  | B3LYP/6-311G(d,p)   | 3.452              | 166.99                     | 166.39                     | 166.69                                          | -694.803080      |
| <br><b>30</b> | B3LYP/6-311G++(d,p) | 3.456              | 168.73                     | 166.87                     | 167.80                                          | -1140.495397     |
|                                                                                                  | B3LYP/6-            | 3.468              | 168.99                     | 166.68                     | 167.84                                          | -1140.296648     |

|                                                                                             |                     |       |        |        |        |              |
|---------------------------------------------------------------------------------------------|---------------------|-------|--------|--------|--------|--------------|
|                                                                                             | 31G+ (d,p)          |       |        |        |        |              |
|                                                                                             | B3LYP/6-311G(d,p)   | 3.457 | 168.59 | 166.95 | 167.77 | -1140.487140 |
|  <p>32</p> | B3LYP/6-311G++(d,p) | 3.416 | 167.22 | 166.73 | 166.98 | -860.896923  |
|                                                                                             | B3LYP/6-31G+ (d,p)  | 3.420 | 167.17 | 166.49 | 166.83 | -860.718146  |
|                                                                                             | B3LYP/6-311G(d,p)   | 3.422 | 167.21 | 166.84 | 167.03 | -860.882651  |
